# Supplementary material
Source: publisher figshare collection journal article supplement (https://tandf.figshare.com/articles/dataset/_/23182704)
Supplement: Supplementary file 1 [file 1]

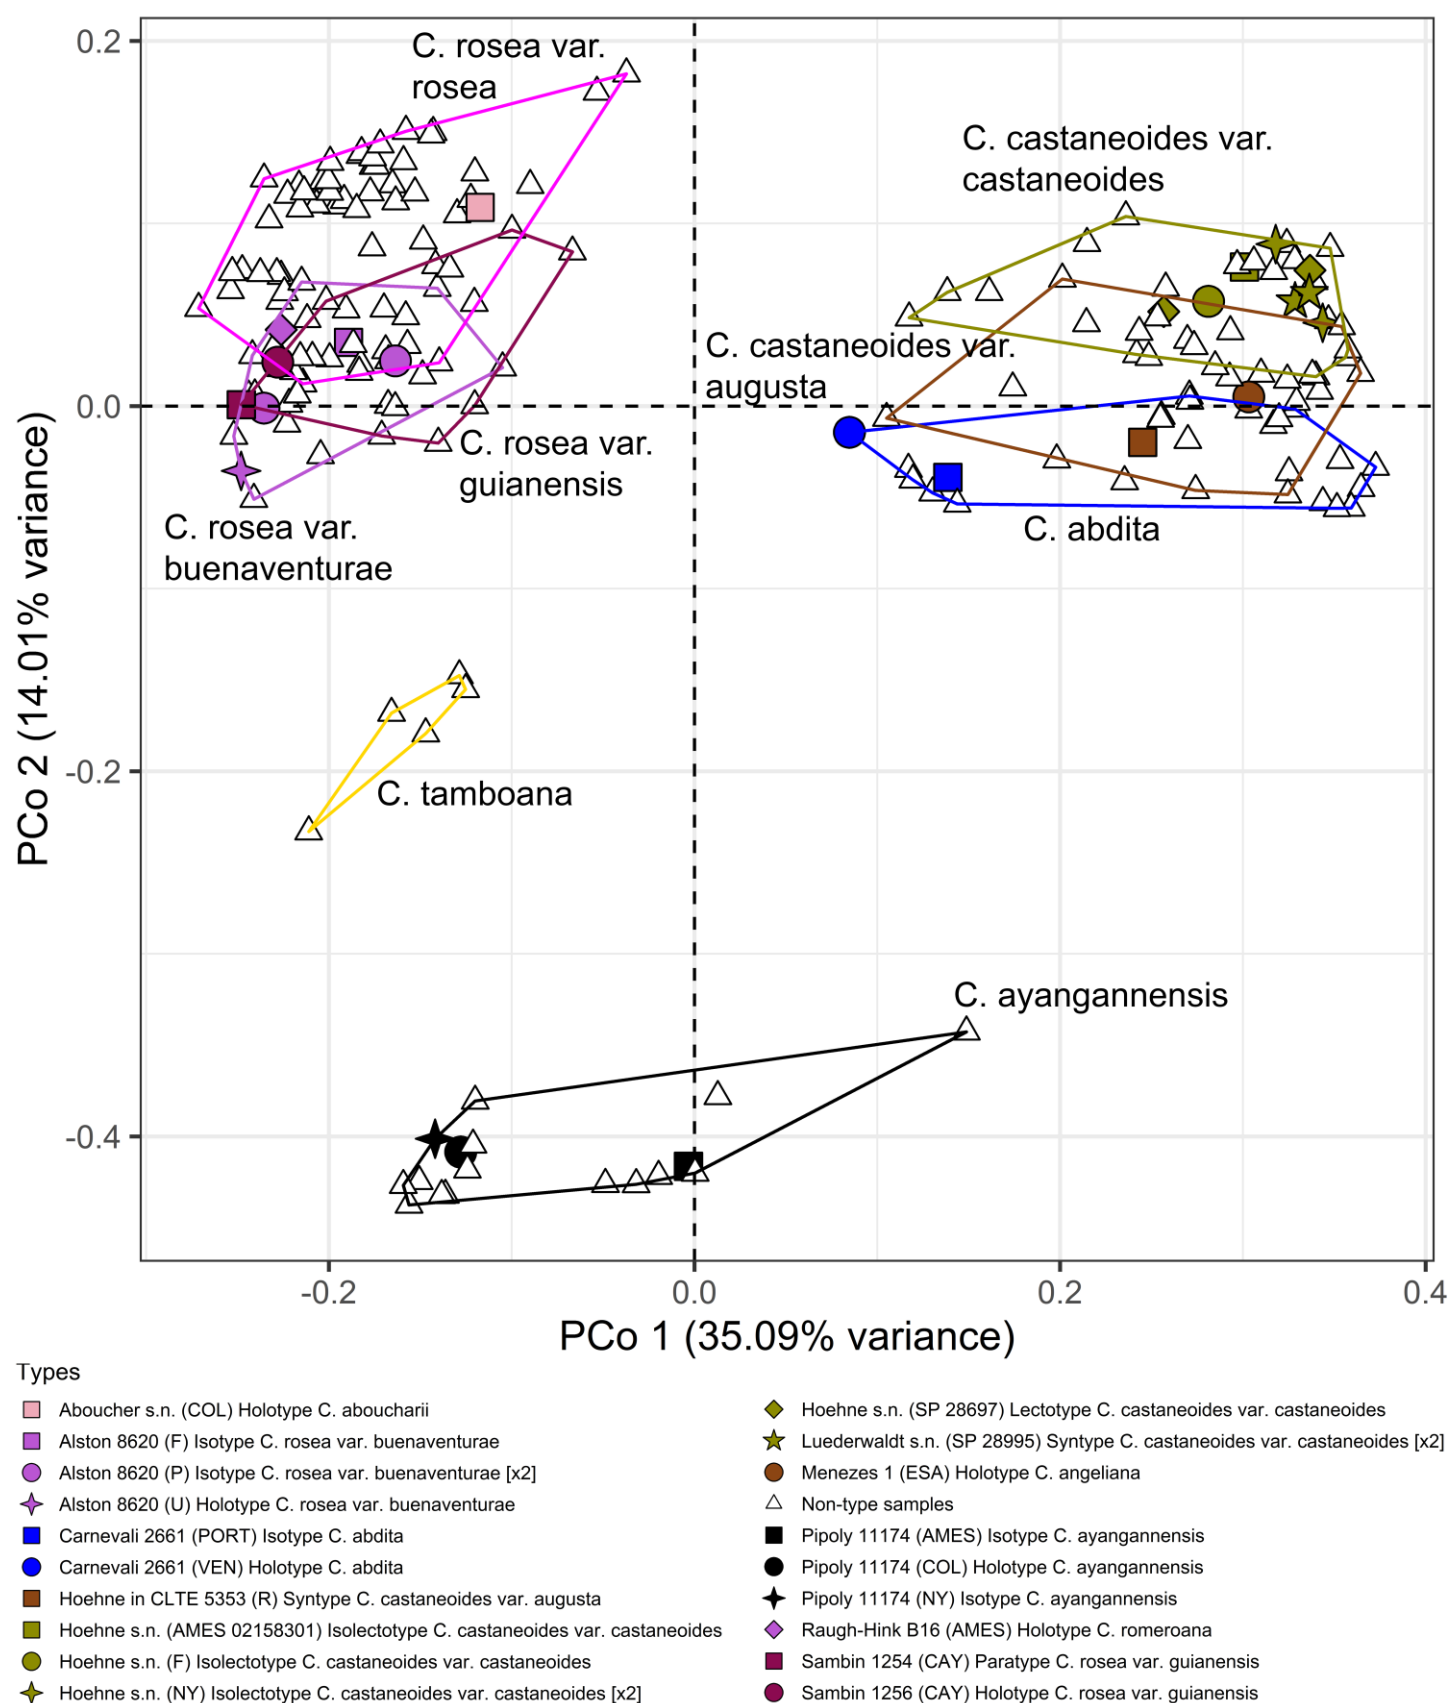

**Figure S1.** Representation of the first PCoA axes of the *C. rosea* complex, highlighting the position of the type specimens. Analysis of the complete dataset [192 individuals and 16 variables]).

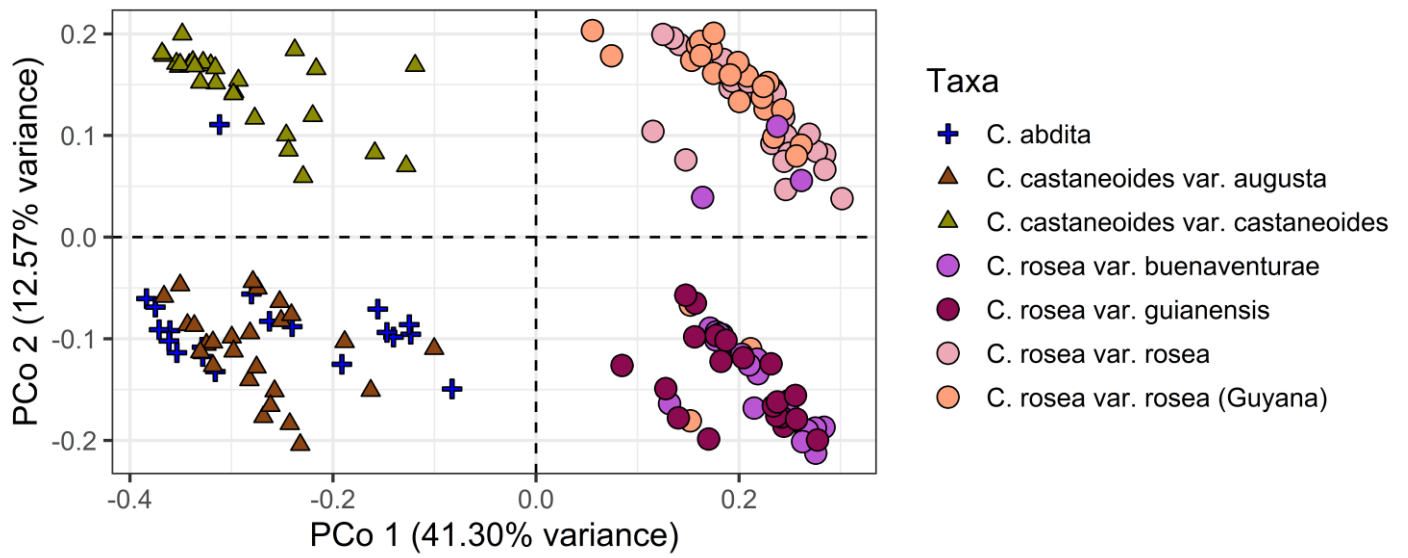

**Figure S2.** Representation of the first PCoA axes of the *C. rosea* complex, highlighting the position of specimens of *C. rosea* var. *rosea* from Guyana. Analysis of the reduced dataset [170 individuals and 15 variables]).

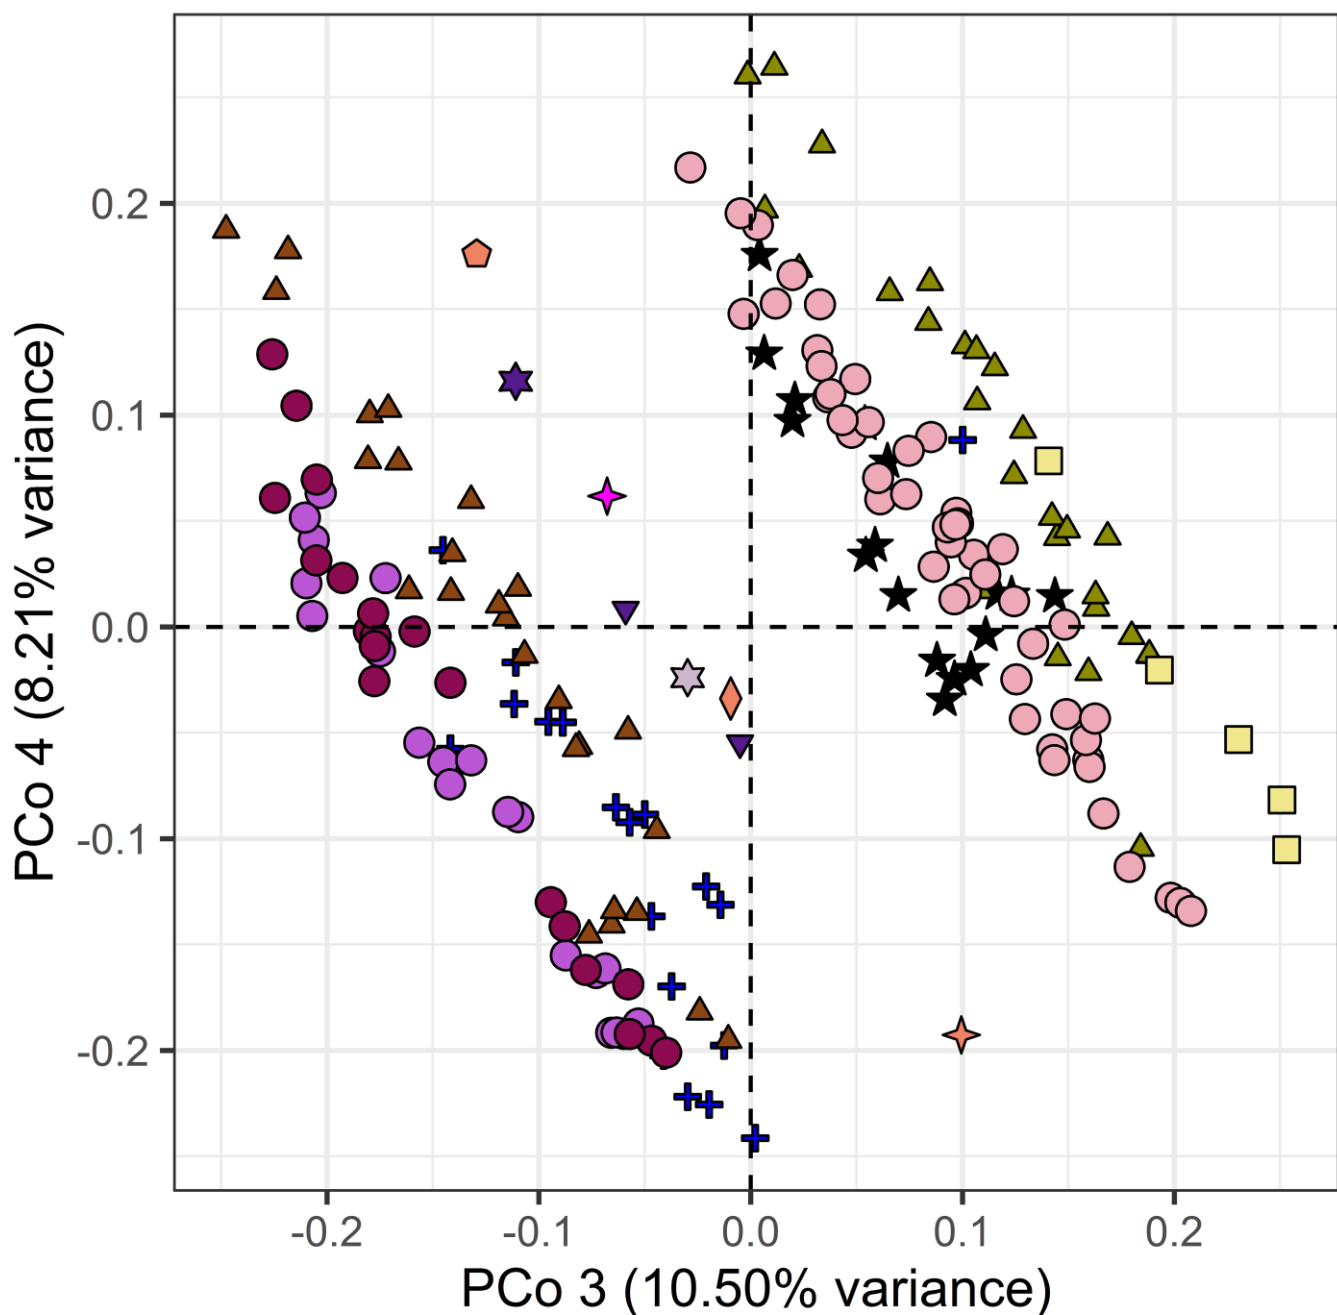

#### Taxa

- + *C. abdita*
- ★ *C. ayangannensis*
- ▲ *C. castaneoides* var. *augusta*
- ▲ *C. castaneoides* var. *castaneoides*
- *C. rosea* var. *buenaventurae*
- *C. rosea* var. *guianensis*
- *C. rosea* var. *rosea*
- *C. tamboana*

#### Specimens with Cse coded as NA

- ▼ Archer 1751 (US) *C. rosea* var. *buenaventurae* [x2]
- ★ Archer 2142 (US) *C. rosea* var. *buenaventurae*
- ★ Castaño 3184 (COAH) *C. rosea* var. *rosea*
- ◊ Henkel 2152 (COL) *C. rosea* var. *rosea* (Guyana)
- ◊ Henkel 2152 (GH) *C. rosea* var. *rosea* (Guyana)
- ★ Henkel 2152 (NY) *C. rosea* var. *rosea* (Guyana)
- ★ Rough-Hink B16 (AMES) Holotypus *C. romeroana*

**Figure S3.** Representation of the first PCoA axes of the *C. rosea* complex, highlighting the position of specimens with the sepal colour variable (Cse) coded as missing data (NA). Test with the complete dataset [192 individuals and 16 variables]). Eigenvalues >1: 1 = 9.90, 2 = 3.93, 3 = 2.93, 4 = 2.29, 5 = 1.06.

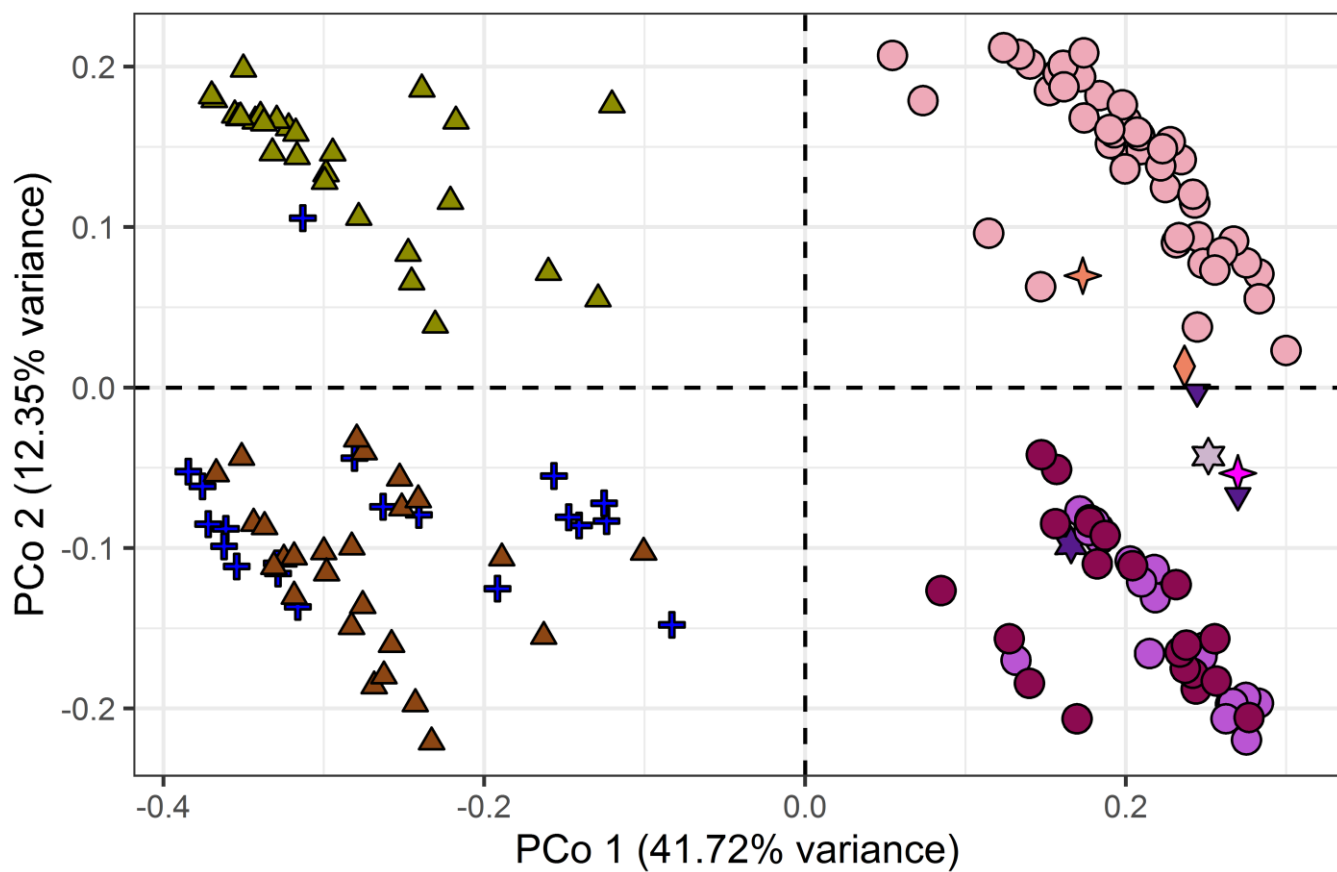

#### Taxa

- ✚ *C. abdita*
- ▲ *C. castaneoides* var. *augusta*
- ▲ *C. castaneoides* var. *castaneoides*
- *C. rosea* var. *buenaventurae*
- *C. rosea* var. *guianensis*
- *C. rosea* var. *rosea*

#### Specimens with Cse coded as NA

- ▼ Archer 1751 (US) *C. rosea* var. *buenaventurae* [x2]
- ★ Archer 2142 (US) *C. rosea* var. *buenaventurae*
- ★ Castaño 3184 (COAH) *C. rosea* var. *rosea*
- ◇ Henkel 2152 (COL) *C. rosea* var. *rosea* (Guyana)
- ◇ Henkel 2152 (GH) *C. rosea* var. *rosea* (Guyana)
- ★ Henkel 2152 (NY) *C. rosea* var. *rosea* (Guyana)
- ★ Raugh-Hink B16 (AMES) Holotypus *C. romeroana*

**Figure S4.** Representation of the first PCoA axes of the *C. rosea* complex, highlighting the position of specimens with the sepal colour variable (Cse) coded as missing data (NA). Test with the reduced dataset [170 individuals and 15 variables]. Eigenvalues >1: 1 = 10.43, 2 = 3.09, 3 = 2.51.
