# Supplementary material
Source: publisher figshare collection journal article supplement (https://tandf.figshare.com/articles/dataset/_/23182704)
Supplement: Supplementary file 2 [file 1]

**Appendix 6.** Records of *Cleistes rosea* and related taxa used for the distribution map. *Cleistes castaneoides* denotes specimens with unknown intraspecific identification.

| Taxa/N/Country               | State/Department | Municipality/Locality       | Coordinates                | Voucher                          |
|------------------------------|------------------|-----------------------------|----------------------------|----------------------------------|
| <i>Cleistes abdita</i> (19)  |                  |                             |                            |                                  |
| Brazil                       | Roraima          | Caracaraí                   | 01°26'04"N, 60°58'51"W     | <i>Barbosa 1184</i> (UEC)        |
| Brazil                       | Roraima          | Caracaraí                   | 01°24'44"N, 60°13'00"W     | <i>Barbosa 1224</i> (INPA)       |
| Brazil                       | Roraima          | Caracaraí                   | 01°06'23"N, 61°00'48"W     | <i>Barbosa 1423</i> (UEC)        |
| Brazil                       | Roraima          | Caracaraí                   | 01°25'34"N, 60°59'10"W     | <i>Cavalcanti 198</i> (INPA)     |
| Brazil                       | Roraima          | Caracaraí                   | 01°12'00"N, 61°12'00"W     | <i>Pessoa 1003</i> (RB)          |
| Colombia                     | Vaupés           | Río Kuduyarí                | 01°20'00"N, 70°30'00"W     | <i>García-Barriga 15842</i> (GH) |
| Colombia                     | Vaupés           | Mitú                        | 01°22'30"N, 70°57'00"W     | <i>Cárdenas 18805</i> (COAH)     |
| Guyana                       | Cuyuni-Mazaruni  | Above Kako Village          | 05°33'27.1"N, 60°59'34.7"W | <i>Redden 7104</i> (AMES)        |
| Guyana                       | Cuyuni-Mazaruni  | Kako River                  | 05°42'48.6"N, 60°38'24.9"W | <i>Wurdack 4897</i> (US)         |
| Guyana                       | Cuyuni-Mazaruni  | Wayalayeng Village          | 05°14'07.9"N, 60°30'37.1"W | <i>Clarke 12160</i> (US)         |
| Guyana                       | Takutu-Essequibo | Gunn's Wai Wai Village      | 01°39'00"N, 58°37'00"W     | <i>Henkel 5251</i> (US)          |
| Venezuela                    | Amazonas         | Átures                      | 05°32'00"N, 67°32'00"W     | <i>Carnevali 2661</i> (VEN)      |
| Venezuela                    | Amazonas         | Casiquiare                  | 02°39'00"N, 66°45'00"W     | <i>Aymard 9184</i> (MO)          |
| Venezuela                    | Amazonas         | 1 km E of Maroa             | 02°42'02"N, 66°48'30"W     | <i>Wurdack 43272</i> (AMES)      |
| Venezuela                    | Amazonas         | Sabana Cumare               | 04°02'59"N, 67°41'59"W     | <i>Wurdack 43763</i> (AMES)      |
| Venezuela                    | Amazonas         | Sabana de San Juan de Ucata | 04°20'26"N, 67°39'24"W     | <i>Romero 2410</i> (AMES)        |
| Venezuela                    | Bolívar          | 2 km S of Rio Chibau        | 06°43'59"N, 61°37'00"W     | <i>Maguire 53520</i> (AMES)      |
| Venezuela                    | Bolívar          | 3 km S of El Pauji          | 04°30'00"N, 61°35'00"W     | <i>Liesner 19701</i> (MO)        |
| Venezuela                    | Bolívar          | Piar                        | 06°10'12"N, 62°37'12"W     | <i>Huber 8264</i> (NY)           |
| <i>C. ayangannensis</i> (15) |                  |                             |                            |                                  |
| Guyana                       |                  | Potaro River Region         | 05°05'00"N, 59°50'00"W     | <i>Boom 9038</i> (MO)            |
| Guyana                       | Cuyuni-Mazaruni  | Mount Ayanganna             | 05°27'00"N, 59°57'00"W     | <i>Pipoly 11174</i> (COL)        |
| Guyana                       | Cuyuni-Mazaruni  | Pakaraima Mountains         | 05°23'00"N, 59°58'00"W     | <i>Henkel 63</i> (MO)            |
| Guyana                       | Cuyuni-Mazaruni  | Paruima                     | 05°49'00"N, 61°12'00"W     | <i>Clarke 5729</i> (NY)          |
| Guyana                       | Potaro-Siparuni  | Mount Ayanganna             | 05°23'05"N, 59°58'33"W     | <i>Radosavljevic 230</i> (AMES)  |
| Guyana                       | Potaro-Siparuni  | Mount Ayanganna             | 05°22'41"N, 59°58'26"W     | <i>Radosavljevic 261</i> (AMES)  |

|                                                             |                  |                       |                              |                                      |
|-------------------------------------------------------------|------------------|-----------------------|------------------------------|--------------------------------------|
| Guyana                                                      | Potaro-Siparuni  | Mount Kopinang        | 05°00'00"N, 59°54'59"W       | <i>Hahn 4372</i> (MO)                |
| Guyana                                                      | Potaro-Siparuni  | Mount Wokomung        | 05°04'03"N, 59°51'42"W       | <i>Clarke 10730</i> (AMES)           |
| Venezuela                                                   | Amazonas         | Cerro de la Neblina   | 00°50'40"N, 65°58'10"W       | <i>Beitel 85195</i> (NY)             |
| Venezuela                                                   | Amazonas         | Río Negro             | 00°51'45.64"N, 66°00'51.42"W | <i>Plowman 13595</i> (NY)            |
| Venezuela                                                   | Bolívar          | Mount Roraima         | 05°07'54.49"N, 60°48'34.26"W | <i>Pinkus 156</i> (AMES)             |
| Venezuela                                                   | Bolívar          | Chimantá Massif       | 05°18'36.62"N, 62°12'25.57"W | <i>Steyermark 74849</i> (AMES)       |
| Venezuela                                                   | Bolívar          | Ilu-Tepui             | 05°23'54"N, 61°00'20"W       | <i>Maguire 33460</i> (NY)            |
| Venezuela                                                   | Bolívar          | Piar                  | 05°40'12"N, 61°45'00"W       | <i>Huber 7762</i> (NY)               |
| Venezuela                                                   | Bolívar          | Piar                  | 05°24'00"N, 62°27'00"W       | <i>Huber 9573</i> (NY)               |
| <b><i>C. castaneoides</i> (15)</b>                          |                  |                       |                              |                                      |
| Bolivia                                                     | La Paz           | Ixiamas               | 13°45'00"S, 68°09'00"W       | <i>White 2308</i> (AMES)             |
| Brazil                                                      | Distrito Federal | Brasília              | 15°55'51"S, 47°54'07"W       | <i>Pansarin 762</i> (UEC)            |
| Brazil                                                      | Distrito Federal | Samambaia             | 15°51'47.98"S, 48°06'25.35"W | <i>Heringer 11308</i> (UB)           |
| Brazil                                                      | Goiás            | Alto Paraíso de Goiás | 13°54'07"S, 47°22'59"W       | <i>Vale 183</i> (BHCB)               |
| Brazil                                                      | Goiás            | Pirenópolis           | 15°51'09"S, 48°57'33"W       | <i>Irwin 34538</i> (NY)              |
| Brazil                                                      | Goiás            | Terezina de Goiás     | 14°01'00"S, 47°34'00"W       | <i>Pansarin 861</i> (UEC)            |
| Brazil                                                      | Goiás            | Terezina de Goiás     | 13°55'00"S, 47°28'00"W       | <i>Pansarin 889</i> (UEC)            |
| Brazil                                                      | Mato Grosso      | E. of Base Camp.      | 12°49'12"S, 51°46'12"W       | <i>Philcox 3957</i> (UB)             |
| Brazil                                                      | Mato Grosso      | Jaciara               | 15°57'55"S, 54°58'06"W       | <i>Amaral 15</i> (UFMT)              |
| Brazil                                                      | Minas Gerais     | Joaquim Felício       | 17°42'26"S, 44°11'31"W       | <i>Rodrigues 66</i> (UEC)            |
| Brazil                                                      | Minas Gerais     | Ouro Branco           | 20°29'31"S, 43°42'52"W       | <i>Campos Porto 505</i> (RB)         |
| Brazil                                                      | Minas Gerais     | Serro                 | 18°25'53"S, 43°25'07"W       | <i>Vasconcelos s.n.</i> (BHCB 40157) |
| Brazil                                                      | Minas Gerais     | Uberlândia            | 18°55'07"S, 48°16'38"W       | <i>Arantes 1808</i> (HUFU)           |
| Brazil                                                      | Pará             | Vigia                 | 00°51'59.39"S, 48°07'19.48"W | <i>Fróes 27838</i> (IAN)             |
| Brazil                                                      | Rondônia         | Without locality      | 10°45'54.11"S, 64°15'03.86"W | <i>Heringer 10555</i> (UB)           |
| <b><i>C. castaneoides</i> var. <i>castaneoides</i> (34)</b> |                  |                       |                              |                                      |
| Brazil                                                      | Bahia            | Lençóis               | 12°33'47"S, 41°23'24"W       | <i>de Carvalho 1071</i> (SP)         |
| Brazil                                                      | Bahia            | Marauá                | 14°14'22"S, 39°00'55"W       | <i>Belém 3542</i> (NY)               |
| Brazil                                                      | Bahia            | Rio de Contas         | 13°31'59"S, 41°55'00"W       | <i>Harley 15613</i> (CEPEC)          |
| Brazil                                                      | Distrito Federal | Brasília              | 15°35'18"S, 48°02'38"W       | <i>Meneguzzo 44</i> (UB)             |

|           |                  |                       |                              |                                   |
|-----------|------------------|-----------------------|------------------------------|-----------------------------------|
| Brazil    | Distrito Federal | Brasília              | 15°41'34"S, 47°59'04"W       | <i>Zanatta 1146</i> (CEN)         |
| Brazil    | Goiás            | Alto Paraíso de Goiás | 14°07'32"S, 47°41'45"W       | <i>ajcaguiar</i> (iNaturalist)    |
| Brazil    | Goiás            | Alto Paraíso de Goiás | 14°07'57"S, 47°30'35"W       | <i>Irwin 12392</i> (NY)           |
| Brazil    | Goiás            | Alto Paraíso de Goiás | 14°07'57"S, 47°30'36"W       | <i>Pansarin 946</i> (UEC)*        |
| Brazil    | Goiás            | Cristalina            | 16°46'07"S, 47°36'49"W       | <i>Hatschbach 58410</i> (UB)      |
| Brazil    | Goiás            | Minaçu                | 13°49'00"S, 48°16'59"W       | <i>Walter 711</i> (SP)            |
| Brazil    | Goiás            | Pirenópolis           | 15°42'48"S, 48°57'08"W       | <i>Chacon 1719</i> (HEPH)         |
| Brazil    | Goiás            | São Gabriel de Goiás  | 15°17'17"S, 47°33'12"W       | <i>Batista 3472</i> (BHCB)        |
| Brazil    | Goiás            | Terezina de Goiás     | 13°55'00"S, 47°25'59"W       | <i>Pansarin 873</i> (UEC)*        |
| Brazil    | Goiás            | Terezina de Goiás     | 13°55'00"S, 47°25'59"W       | <i>Pansarin 888</i> (UEC)*        |
| Brazil    | Mato Grosso      | Juruena               | 10°19'05"S, 58°21'32"W       | <i>Hoehne 5328</i> (SP)           |
| Brazil    | Mato Grosso      | Nova Xavantina        | 14°45'36"S, 52°33'24"W       | Rebecca Bachman (iNaturalist)     |
| Brazil    | Minas Gerais     | Capitólio             | 20°38'51.03"S, 46°13'48.05"W | <i>Romero 7473</i> (HUFU)         |
| Brazil    | Minas Gerais     | Diamantina            | 18°14'17"S, 43°36'40"W       | <i>Egler s.n.</i> (RB 59974)      |
| Brazil    | Minas Gerais     | Joaquim Felício       | 17°42'30"S, 44°11'43"W       | <i>Souza 30143</i> (HPL)          |
| Brazil    | Minas Gerais     | Ouro Preto            | 13°57'00"S, 47°28'00"W       | <i>Pansarin 868</i> (UEC)         |
| Brazil    | Minas Gerais     | Santana do Riacho     | 19°18'10"S, 43°33'30"W       | <i>Batista 1780</i> (BHCB)        |
| Brazil    | Minas Gerais     | Uberaba               | 19°44'54"S, 47°55'55"W       | <i>Oliveira 1589</i> (HUFU)       |
| Brazil    | Minas Gerais     | Uberlândia            | 18°55'07"S, 48°16'38"W       | <i>Barbosa s.n.</i> (HUFU 45459)  |
| Brazil    | Pará             | Marapanim             | 00°37'00"S, 47°40'59"W       | <i>Davidse 17876</i> (INPA)       |
| Brazil    | Pará             | Vigia                 | 01°03'00"S, 48°07'12"W       | <i>Davidse 17545</i> (NY)         |
| Brazil    | Paraná           | Palmeira              | 25°27'52"S, 49°45'59"W       | <i>Silva 9947</i> (MBM)           |
| Brazil    | Roraima          | Caracará              | 01°16'48"N, 61°00'00"W       | <i>Pessoa 336</i> (INPA)          |
| Brazil    | São Paulo        | São Paulo             | 23°36'21"S, 46°39'46"W       | <i>Hoehne s.n.</i> (NY 00414849)  |
| Brazil    | São Paulo        | São Paulo             | 23°32'24"S, 46°37'48"W       | <i>Hoehne s.n.</i> (SP 28697)     |
| Colombia  | Guaviare         | San José de Guaviare  | 02°23'0.3"N, 72°42'20.6"W    | <i>Castro 189</i> (COL)           |
| Colombia  | Guaviare         | San José del Guaviare | 02°29'34"N, 72°41'12"W       | <i>gingerdamato</i> (iNaturalist) |
| Colombia  | Vichada          | Comisaría del Vichada | 04°14'38.69"N, 69°16'54.21"W | <i>Cabrera 2312</i> (COL)         |
| Venezuela | Amazonas         | Río Negro             | 02°25'48"N, 65°19'48"W       | <i>Huber 6197</i> (NY)            |
| Venezuela | Bolívar          | Gran Sabana           | 05°00'00"N, 61°10'00"W       | <i>Liesner 24365</i> (MO)         |

*C. castaneoides* var. *augusta* (32)

|          |              |                          |                              |                               |
|----------|--------------|--------------------------|------------------------------|-------------------------------|
| Brazil   | Bahia        | Ituberá                  | 13°43'12"S, 39°01'40"W       | <i>Batista 3426</i> (BHCB)    |
| Brazil   | Bahia        | Lençóis                  | 12°28'00"S, 41°25'59"W       | <i>Thomas 12975</i> (CEPEC)   |
| Brazil   | Bahia        | Palmeiras                | 12°25'59"S, 41°25'00"W       | <i>Conceição 1138</i> (HUEFS) |
| Brazil   | Bahia        | Prado                    | 17°20'28"S, 39°13'15"W       | <i>Hatschbach 63048</i> (MBM) |
| Brazil   | Goiás        | Águas Lindas de Goiás    | 15°44'25.62"S, 48°20'13.66"W | <i>Miranda 68</i> (CEN)       |
| Brazil   | Goiás        | Alto Paraíso de Goiás    | 14°07'57"S, 47°30'36"W       | <i>Gates 49</i> (UB)          |
| Brazil   | Goiás        | Alto Paraíso de Goiás    | 14°07'57"S, 47°30'36"W       | <i>Pansarin 946</i> (UEC)*    |
| Brazil   | Goiás        | Alto Paraíso de Goiás    | 14°03'00"S, 47°30'00"W       | <i>Rodrigues 1438</i> (UEC)   |
| Brazil   | Goiás        | Cavalcante               | 13°23'54"S, 46°19'06"W       | <i>Batista 829</i> (CEN)      |
| Brazil   | Goiás        | Cavalcante               | 13°46'59"S, 47°27'00"W       | <i>Pansarin 941</i> (UEC)     |
| Brazil   | Goiás        | Corumbá de Goiás         | 15°55'25"S, 48°48'31"W       | <i>Irwin 34545</i> (NY)       |
| Brazil   | Goiás        | Luziânia                 | 16°40'35"S, 47°59'25"W       | <i>Cezare 563</i> (UB)        |
| Brazil   | Goiás        | São João da Aliança      | 14°21'07"S, 47°31'21"W       | <i>Simões 1201</i> (UEC)      |
| Brazil   | Goiás        | Terezina de Goiás        | 13°55'00"S, 47°25'59"W       | <i>Pansarin 873</i> (UEC)*    |
| Brazil   | Goiás        | Terezina de Goiás        | 13°55'00"S, 47°25'59"W       | <i>Pansarin 888</i> (UEC)*    |
| Brazil   | Maranhão     | Carolina                 | 07°14'59.29"S, 47°26'35.37"W | <i>Oliveira 264</i> (CEN)     |
| Brazil   | Mato Grosso  | 1.5 km E.S.E. Base Camp. | 12°49'12"S, 51°46'12"W       | <i>Philcox 3503</i> (UB)      |
| Brazil   | Mato Grosso  | Cuiabá                   | 15°35'46"S, 56°05'48"W       | <i>Hatschbach 37342</i> (MBM) |
| Brazil   | Mato Grosso  | Rio Verde                | 18°56'20.86"S, 54°54'09.87"W | <i>Hatschbach 35973</i> (MBM) |
| Brazil   | Minas Gerais | Buenópolis               | 17°49'42"S, 44°15'49"W       | <i>Costa 1180</i> (DIAM)      |
| Brazil   | Minas Gerais | Datas                    | 18°25'53"S, 43°40'41"W       | <i>Pirani 5213</i> (SPF)      |
| Brazil   | Minas Gerais | Formoso                  | 14°55'44.61"S, 46°02'27.23"W | <i>Azevedo 1297</i> (IBGE)    |
| Brazil   | Minas Gerais | Gouveia                  | 18°35'40"S, 43°56'20"W       | <i>Batista 3124</i> (BHCB)    |
| Brazil   | Minas Gerais | Joaquim Felício          | 17°45'27"S, 44°10'20"W       | <i>Hatschbach 64274</i> (MBM) |
| Brazil   | Minas Gerais | Santana do Riacho        | 19°10'08"S, 43°42'52"W       | <i>Martins 15</i> (BHCB)      |
| Brazil   | Minas Gerais | São Gonçalo do Rio Preto | 18°00'15"S, 43°23'27"W       | <i>Viana 1397</i> (BHCB)      |
| Brazil   | Pará         | Serra do Cachimbo        | 09°20'00"S, 54°57'53"W       | <i>Pires 6084</i> (NY)        |
| Brazil   | Pará         | Without locality         | 00°56'37.34"S, 48°05'0.29"W  | <i>Pires 6756</i> (IAN)       |
| Colombia | Amazonas     | Aeropuerto de Araracuara | 00°36'05.57"S, 72°23'44.79"W | <i>Idrobo 8982</i> (COL)      |

|                                                |            |                          |                              |                                      |
|------------------------------------------------|------------|--------------------------|------------------------------|--------------------------------------|
| Colombia                                       | Guainía    | Inírida                  | 03°50'23.9"N, 67°54'26.1"W   | <i>Cárdenas 14926</i> (COAH)         |
| Colombia                                       | Guainía    | Inírida                  | 03°43'48.6"N, 67°50'03.25"W  | <i>Cárdenas 44325</i> (COAH)         |
| Peru                                           | San Martín | Rioja                    | 06°08'02"S, 77°13'31"W       | <i>Woytkowski 6228</i> (MO)          |
| <b><i>C. rosea</i> var. <i>rosea</i> (136)</b> |            |                          |                              |                                      |
| Brazil                                         | Amapá      | Calçoene                 | 02°22'00"N, 51°25'59"W       | <i>Pereira 184</i> (INPA)            |
| Brazil                                         | Amapá      | Macapá                   | 00°04'03.45"N, 51°02'24.72"W | <i>Dantas 944</i> (IAN)              |
| Brazil                                         | Amazonas   | Barcelos                 | 00°58'29"S, 62°55'27"W       | <i>da Silva 584</i> (IAN)            |
| Brazil                                         | Amazonas   | Barcelos                 | 00°51'48"N, 63°19'59"W       | <i>Forzza 8015</i> (RB)              |
| Brazil                                         | Amazonas   | Jauareté                 | 01°28'00"N, 68°00'00"W       | <i>Ribeiro 966</i> (IAN)             |
| Brazil                                         | Amazonas   | Novo Airão               | 01°42'00"S, 60°06'00"W       | <i>de Albuquerque 1394</i> (INPA)    |
| Brazil                                         | Amazonas   | São Gabriel da Cachoeira | 00°07'03.47"S, 67°06'07.39"W | <i>Coêlho 2</i> (INPA)               |
| Brazil                                         | Pará       | Bela Vista               | 04°27'03.50"S, 56°12'38.05"W | <i>Ducke s.n.</i> (RB 18728)         |
| Brazil                                         | Pará       | Gurupá                   | 01°24'46.21"S, 51°38'0.51"W  | <i>Ducke s.n.</i> (RB 18703)         |
| Brazil                                         | Pará       | Tirirós                  | 02°07'48"N, 55°54'00"W       | <i>Fittkau s.n.</i> ((INPA0012917)   |
| Brazil                                         | Roraima    | Alto Alegre              | 03°24'00"N, 61°25'59"W       | <i>Milliken 367</i> (MO)             |
| Brazil                                         | Roraima    | Boa Vista                | 03°45'00"N, 61°45'00"W       | <i>Silva 431</i> (NY)                |
| Brazil                                         | Roraima    | Cantá                    | 02°32'56"N, 60°47'15"W       | <i>Ismael Oliveira</i> (iNaturalist) |
| Colombia                                       | Amazonas   | Corregimiento            | 01°24'33.1"N, 72°45'42"W     | <i>Jaimes 1474</i> (COAH)            |
| Colombia                                       | Antioquia  | Alejandro                | 06°19'50"N, 75°06'47"W       | <i>Gómez 135</i> (HUA)               |
| Colombia                                       | Antioquia  | Anorí                    | 07°01'44"N, 75°14'14"W       | <i>Julian Alzate</i> (iNaturalist)   |
| Colombia                                       | Antioquia  | Cocorná                  | 06°02'00"N, 75°08'00"W       | <i>Cañas s.n.</i> (HUA 76164)        |
| Colombia                                       | Antioquia  | Guatapé                  | 06°18'04.16"N, 75°08'22.75"W | <i>Escobar 6826</i> (HUA)            |
| Colombia                                       | Antioquia  | La Fragua                | 07°18'40.36"N, 74°50'00"W    | <i>Trujillo 5850</i> (HUA)           |
| Colombia                                       | Antioquia  | San Carlos               | 06°03'27"N, 74°48'48"W       | <i>Verónica VH</i> (iNaturalist)     |
| Colombia                                       | Antioquia  | San Luis                 | 06°06'01"N, 75°02'25"W       | <i>Fonnegra 5833</i> (MO)            |
| Colombia                                       | Antioquia  | San Rafael               | 06°20'45"N, 74°58'59"W       | <i>Carmona 1111</i> (HUA)            |
| Colombia                                       | Antioquia  | San Rafael               | 06°23'31"N, 75°02'20"W       | <i>David 4299</i> (HUA)              |
| Colombia                                       | Antioquia  | San Roque                | 06°30'20.1"N, 74°55'05.03"W  | <i>Robles 2314</i> (HUA)             |
| Colombia                                       | Antioquia  | Vereda Barro Blanco      | 06°02'14.12"N, 75°11'05.01"W | <i>Bedoya 200</i> (HUA)              |
| Colombia                                       | Antioquia  | Yamural                  | 06°59'52.38"N, 75°24'51.18"W | <i>Restrepo 496</i> (HUA)            |

|          |                 |                    |                              |                                       |
|----------|-----------------|--------------------|------------------------------|---------------------------------------|
| Colombia | Antioquia       | Yolombó            | 06°45'44.7"N, 75°06'04.7"W   | <i>David 4545</i> (HUA)               |
| Colombia | Boyacá          | Muzo               | 05°34'09"N, 74°11'52"W       | william336 (iNaturalist)              |
| Colombia | Boyacá          | Santa María        | 04°53'48"N, 73°17'27"W       | Johnnier Arango (iNaturalist)         |
| Colombia | Caldas          | Samaná             | 05°32'00"N, 75°03'00"W       | <i>Betancur 16832</i> (COL)           |
| Colombia | Caldas          | Samaná             | 05°31'19"N, 75°02'55"W       | <i>Betancur 18294</i> (COL)           |
| Colombia | Caldas          | Victoria           | 05°21'23"N, 74°56'14"W       | Daniel Faccini (iNaturalist)          |
| Colombia | Caquetá         | Florencia          | 01°45'51"N, 75°38'06"W       | <i>Cárdenas 50295</i> (COAH)          |
| Colombia | Caquetá         | Florencia          | 01°37'0.2"N, 75°43'11.5"W    | <i>Castaño 3184</i> (COAH)            |
| Colombia | Caquetá         | Florencia          | 01°43'01"N, 75°34'59"W       | <i>Jaimes 1269</i> (COAH)             |
| Colombia | Caquetá         | Florencia          | 01°43'10"N, 75°40'39"W       | Jesmith R. Vidal (iNaturalist)        |
| Colombia | Caquetá         | Florencia          | 01°43'08"N, 75°40'43"W       | Jesmith R. Vidal (iNaturalist)        |
| Colombia | Caquetá         | Florencia          | 01°44'00"N, 75°40'00"W       | <i>Sanín 6454</i> (COL)               |
| Colombia | Caquetá         | Florencia          | 01°47'09.91"N, 75°39'13.68"W | <i>Santa 1248</i> (HUA)               |
| Colombia | Caquetá         | Florencia          | 01°38'17"N, 75°35'12"W       | victor_007 (iNaturalist)              |
| Colombia | Cundinamarca    | Gualivá            | 04°57'50"N, 74°26'03"W       | <i>Huertas 9</i> (AMES)               |
| Colombia | Cundinamarca    | La Palma           | 05°21'30"N, 74°23'26"W       | Laura Pirateque (iNaturalist)         |
| Colombia | Cundinamarca    | Sasaima            | 04°57'50"N, 74°26'03"W       | <i>Schneider 183</i> (AMES)           |
| Colombia | Guainía         | Inírida            | 03°48'44.7"N, 67°48'31.7"W   | <i>Barona 1026</i> (COAH)             |
| Colombia | Guaviare        | Mount Chiribiquete | 01°12'27.65"N, 72°43'23.59"W | <i>Schultes 5442a</i> (US)            |
| Colombia | Huila           | Colombia           | 03°23'57"N, 74°40'18"W       | Luiyi Cruz (iNaturalist)              |
| Colombia | Huila           | Paicol             | 02°23'02"N, 75°48'22"W       | Cristian D.C. Rodríguez (iNaturalist) |
| Colombia | Magdalena       | Santa Marta        | 10°56'10"N, 73°42'40.74"W    | <i>Seifriz 606</i> (US)               |
| Colombia | Santander       | Contratación       | 06°16'52"N, 73°28'28"W       | Rafael A.P. Salinas (iNaturalist)     |
| Colombia | Santander       | Los Santos         | 06°49'15"N, 73°05'29"W       | <i>Fernández-Alonso 24301</i> (COL)   |
| Colombia | Santander       | Los Santos         | 06°58'07.98"N, 73°03'06.32"W | <i>Langenheim 3316</i> (COL)          |
| Colombia | Santander       | Villanueva         | 06°38'12"N, 73°00'10"W       | Jessica Lisiewski (iNaturalist)       |
| Colombia | Santander       | Villanueva         | 06°43'40"N, 73°04'16"W       | Jessica Lisiewski (iNaturalist)       |
| Colombia | Tolima          | El Convenio        | 04°56'58"N, 74°59'40"W       | <i>Pennell 3481</i> (AMES)            |
| Colombia | Tolima          | Icononzo           | 04°12'47"N, 74°33'40"W       | Miguel M. Palacios (iNaturalist)      |
| Colombia | Valle del Cauca | Pavas              | 05°16'00"N, 75°03'00"W       | <i>Pennell 5495</i> (AMES)            |

|          |                   |                              |                              |                                      |
|----------|-------------------|------------------------------|------------------------------|--------------------------------------|
| Colombia | Valle del Cauca   | Santiago de Cali             | 03°19'01"N, 76°34'45"W       | Duvan Garcia (iNaturalist)           |
| Colombia | Valle del Cauca   | Santiago de Cali             | 03°19'37"N, 76°35'35"W       | hermannb (iNaturalist)               |
| Colombia | Vaupés            | Río Papurí                   | 00°43'58"N, 69°27'00"W       | <i>Schultes 19485</i> (AMES)         |
| Colombia | Vaupés            | Río Vaupés                   | 00°50'00"N, 70°45'00"W       | <i>Schultes 19001</i> (AMES)         |
| Ecuador  | Morona Santiago   | Morona                       | 02°58'56"S, 78°13'36"W       | ajott (iNaturalist)                  |
| Ecuador  | Napo-Pastaza      | Cashurco                     | 01°27'39"S, 78°06'40"W       | <i>Asplund 19351</i> (AMES)          |
| Ecuador  | Tungurahua        | Baños                        | 01°28'18"S, 78°00'36"W       | arethusa (iNaturalist)               |
| Guyana   | Berbice-Corentyne | Barakara                     | 05°50'42"N, 57°27'54"W       | <i>Taylor 71</i> (AMES)              |
| Guyana   | Berbice-Corentyne | Canje River                  | 05°20'00"N, 57°38'00"W       | <i>Pipoly 11390</i> (US)             |
| Guyana   | Cuyuni-Mazaruni   | Imbaimadia                   | 05°42'33.6"N, 60°18'07.6"W   | <i>Wurdack 5160</i> (US)             |
| Guyana   | Cuyuni-Mazaruni   | Kamakusa Mountain            | 05°45'58.9"N, 60°15'57.6"W   | <i>Redden 7195</i> (US)**            |
| Guyana   | Cuyuni-Mazaruni   | Kamakusa Mountain            | 05°52'54"N, 60°06'09"W       | <i>Wurdack 5713</i> (AMES)           |
| Guyana   | Cuyuni-Mazaruni   | Merume Mountains             | 05°47'59"N, 60°06'00"W       | <i>Maguire 43840</i> (NY)            |
| Guyana   | Cuyuni-Mazaruni   | Pakaraima Mountains          | 05°43'00"N, 60°18'00"W       | <i>Hoffman 1946</i> (GH)             |
| Guyana   | Cuyuni-Mazaruni   | Utshe river                  | 05°44'00"N, 61°10'00"W       | <i>McDowell 2855</i> (US)            |
| Guyana   | Demerara-Berbice  | Lower Kajarau Creek          | 06°24'59"N, 58°34'59"W       | <i>Henkel 2152</i> (MO)              |
| Guyana   | Demerara-Mahaica  | St. Cuthbert's Mission       | 06°22'00"N, 58°04'00"W       | <i>Mori 8033</i> (NY)                |
| Guyana   | Mazaruni-Potaro   | Pakaraima Mountains          | 05°43'00"N, 60°18'00"W       | <i>Pipoly 7890</i> (NY)              |
| Guyana   | Pomeroon–Supenaam | Lake Capooey [Capoey]        | 07°12'21"N, 58°31'02"W       | <i>Schomburgk s.n.</i> (P P00367101) |
| Guyana   | Potaro–Siparuni   | Kaieteur Falls               | 05°10'35.92"N, 59°29'05.38"W | <i>Cowan 1778</i> (US)               |
| Guyana   | Potaro–Siparuni   | Kaieteur Falls               | 05°10'35.92"N, 59°29'05.38"W | <i>Cowan 1971</i> (US)               |
| Guyana   | Potaro–Siparuni   | Kaieteur Falls               | 05°10'35.92"N, 59°29'05.38"W | <i>Cowan 2214</i> (US)               |
| Guyana   | Potaro-Siparuni   | Kaieteur Falls               | 05°10'39.29"N, 59°28'50.01"W | Peter Zika (iNaturalist)             |
| Guyana   | Potaro-Siparuni   | Kaieteur Falls National Park | 05°10'30"N, 59°28'49.8"W     | <i>Hahn 4467</i> (MO)                |
| Guyana   | Potaro-Siparuni   | Kopinang Savanna             | 04°56'00"N, 60°00'00"W       | <i>Maguire 46091A</i> (NY)           |
| Guyana   | Potaro-Siparuni   | Kopinang-Orinduik            | 04°57'00"N, 59°52'48"W       | <i>Boom 9289</i> (NY)                |
| Guyana   | Potaro-Siparuni   | Mount Ayanganna              | 05°27'00"N, 60°09'00"W       | <i>Maguire 40623</i> (NY)            |
| Guyana   | Potaro-Siparuni   | Pakaraima Mountains          | 04°50'00"N, 59°58'00"W       | <i>Henkel 898</i> (US)               |
| Guyana   | Potaro-Siparuni   | Pakaraima Mountains          | 05°03'59"N, 59°57'00"W       | <i>Henkel 1592</i> (U)               |
| Guyana   | Potaro-Siparuni   | Pakaraima Mountains          | 04°48'00"N, 60°16'00"W       | <i>Henkel 5536</i> (MO)              |

|                     |                 |                         |                              |                                     |
|---------------------|-----------------|-------------------------|------------------------------|-------------------------------------|
| Guyana              | Potaro-Siparuni | Pakaraima Mountains     | 05°05'00"N, 59°59'00"W       | <i>Henkel 6516</i> (US)             |
| Guyana              | Potaro-Siparuni | Pakaraima Mountains     | 04°58'01"N, 59°54'00"W       | <i>Maguire 46030A</i> (NY)          |
| Guyana              | Potaro-Siparuni | Rest of Region 8        | 05°16'44"N, 59°19'23"W       | Aaron RK (iNaturalist)              |
| Guyana              |                 | Tuibarodai              | 06°06'16.81"N, 60°13'30.55"W | Without collector 7917 (NY)         |
| Panama              | Coclé           | Antón                   | 08°35'15"N, 80°08'05"W       | Oren Weiss (iNaturalist)            |
| Panama              | Coclé           | Llano Bonito            | 08°31'24"N, 80°02'18"W       | <i>Seibert 594</i> (MO)             |
| Panama              | Coclé           | Penonomé                | 08°27'52"N, 80°25'16"W       | Ahmed J. Santana (iNaturalist)      |
| Panama              | Coclé           | Savannas near El Valle  | 08°36'00"N, 80°07'59"W       | <i>Duke 6592A</i> (MO)              |
| Panama              | Panamá          | Capira                  | 08°42'23"N, 79°53'13"W       | <i>Sullivan 446</i> (MO)            |
| Panama              | Panamá          | Cerro Azul              | 09°13'56"N, 79°24'10"W       | Annie Muñoz (iNaturalist)           |
| Panama              | Panamá          | Cerro Azul              | 09°10'02"N, 79°24'58"W       | <i>Dwyer 2059</i> (MO)              |
| Panama              | Panamá          | Cerro Jefe              | 09°15'00"N, 79°30'00"W       | <i>Knapp 5192</i> (MO)              |
| Panama              | Panamá          | Panamá                  | 09°13'25"N, 79°22'18"W       | Alex Espinosa (iNaturalist)         |
| Panama              | Panamá          | Panamá                  | 09°13'56"N, 79°24'10"W       | Rich Kostecke (iNaturalist)         |
| Panama              | Panamá          | Panama City             | 08°57'00"N, 79°31'59"W       | <i>Powell 113</i> (MO)              |
| Panama              | Panamá          | Tocumen                 | 09°05'42"N, 79°22'48"W       | <i>Powell 3395</i> (AMES)           |
| Panama              | Veraguas        | Santa Fe                | 08°31'22"N, 81°07'35"W       | <i>Sytsma 4788</i> (MO)             |
| Peru                | Cuzco           |                         | 09°11'02"S, 74°08'24"W       | <i>Bues s.n.</i> (F V0435967F)      |
| Peru                | Cuzco           | Huanuco-Pampayacu       | 09°55'50"S, 76°14'32"W       | <i>Kanehira 325</i> (AMES)          |
| Peru                | Cajamarca       | San Ignacio             | 05°08'41"S, 78°59'58"W       | Thalis Castillo (iNaturalist)       |
| Peru                | San Martín      | Moyobamba               | 06°04'43"S, 76°58'56"W       | Sasha Robinson (iNaturalist)        |
| Trinidad and Tobago | Sangre Grande   | Aripo Savannas          | 10°36'33"N, 61°11'34"W       | Linton_Arneaud (iNaturalist)        |
| Trinidad and Tobago | Trinidad        | Aripo                   | 10°37'07"N, 61°11'00"W       | <i>Crueger s.n.</i> (TRIN 1830)     |
| Trinidad and Tobago | Trinidad        | Cedros                  | 10°07'02"N, 61°48'21"W       | <i>Sankaralli s.n.</i> (TRIN 13393) |
| Trinidad and Tobago | Trinidad        | Erin Savanna            | 10°06'49"N, 61°39'11"W       | <i>Philcox 8157</i> (TRIN)          |
| Trinidad and Tobago | Trinidad        | Long Stretch            | 10°38'35.23"N, 61°12'04.51"W | <i>Baker s.n.</i> (TRIN 13524)      |
| Trinidad and Tobago | Trinidad        | Mount Tabor             | 10°40'00"N, 61°24'00"W       | <i>Barnes s.n.</i> (TRIN 30725)     |
| Trinidad and Tobago | Trinidad        | Valencia-Sangre Grande  | 10°37'07"N, 61°11'00"W       | <i>Freeman s.n.</i> (TRIN 11319)    |
| Venezuela           | Amazonas        | Maypures                | 05°12'59.63"N, 67°49'26.11"W | <i>Spruce 3603</i> (P)              |
| Venezuela           | Amazonas        | San Carlos de Río Negro | 01°51'00"N, 67°03'00"W       | <i>Liesner 8565</i> (MO)            |



|                                                       |                  |                                       |                              |                                   |
|-------------------------------------------------------|------------------|---------------------------------------|------------------------------|-----------------------------------|
| Venezuela                                             | Amazonas         | Laja Catipan                          | 01°29'02"N, 66°31'37"W       | <i>Wurdack 43441</i> (NY)         |
| Venezuela                                             | Amazonas         | Sabana Manacal                        | 03°42'17.65"N, 67°28'30.69"W | <i>Wurdack 42983</i> (NY)         |
| Venezuela                                             | Amazonas         | Sierra Parima                         | 03°30'00"N, 64°15'00"W       | <i>Steyermark 106114</i> (AMES)   |
| Venezuela                                             | Aragua           |                                       | 10°00'00"N, 67°10'00"W       | <i>Schnee 1118</i> (F)            |
| Venezuela                                             | Aragua           | Ricaurte                              | 10°12'24.47"N, 67°22'37.58"W | <i>Renz 9149</i> (RENZ)           |
| Venezuela                                             | Aragua           | Sierra Maestra                        | 10°02'41.69"N, 67°19'51.16"W | <i>Schwarz 3</i> (US)             |
| Venezuela                                             | Aragua           | Tovar                                 | 10°24'59"N, 67°16'59"W       | <i>Fendler 1551</i> (GH)          |
| Venezuela                                             | Bolívar          | Gran Sabana                           | 04°59'00"N, 61°10'00"W       | <i>Duno 35</i> (US)               |
| Venezuela                                             | Bolívar          | Gran Sabana                           | 05°35'05"N, 61°45'03"W       | <i>Lasser 1821</i> (NY)           |
| Venezuela                                             | Bolívar          | Km 118 S of El Dorado                 | 06°42'00"N, 61°37'59"W       | <i>Gentry 10577</i> (MO)          |
| Venezuela                                             | Bolívar          | Raudal Maturin                        | 06°21'59"N, 63°18'59"W       | <i>Stergios 11192</i> (NY)        |
| Venezuela                                             | Bolívar          | Río Cuyuní, 130-131 km S de El Dorado | 06°46'56"N, 61°13'35"W       | <i>Steyermark 10407</i> (AMES)    |
| Venezuela                                             | Distrito Capital |                                       | 10°28'35"N, 66°58'59"W       | <i>Renz 9571</i> (RENZ)           |
| Venezuela                                             | Distrito Capital | Cotiza                                | 10°32'08.54"N, 66°55'18.08"W | <i>Pittier 7405</i> (US)          |
| Venezuela                                             | Miranda          | El Hatillo                            | 10°25'59"N, 66°48'00"W       | <i>DeWolf 2130</i> (A)            |
| Venezuela                                             | Sucre            | Cumana                                | 10°27'23"N, 64°10'03"W       | <i>Funck 635</i> (P)              |
| Venezuela                                             | Táchira          | Cordero-Tariba                        | 07°04'33"N, 65°54'43"W       | <i>Steyermark 57131</i> (F)       |
| Venezuela                                             | Táchira          | Uribante                              | 07°57'00"N, 71°42'00"W       | <i>Dorr 7116</i> (AMES)           |
| Venezuela                                             | Táchira          | Uribante                              | 07°47'16"N, 71°51'31"W       | <i>van der Werff 4897</i> (MO)    |
| Venezuela                                             | Trujillo         |                                       | 09°20'48.27"N, 70°26'26.69"W | <i>Renz 4275</i> (RENZ)           |
| <b><i>C. rosea</i> var. <i>buenaventurae</i> (17)</b> |                  |                                       |                              |                                   |
| Colombia                                              | Chocó            | La Oveja-Quibdó                       | 05°42'01.03"N, 76°38'30.50"W | <i>Archer 1751</i> (US)           |
| Colombia                                              | Chocó            | Quibdó                                | 05°41'41"N, 76°39'44"W       | <i>Forero 1139</i> (MO)           |
| Colombia                                              | Chocó            | Quibdó-Medellin                       | 05°41'27"N, 76°34'47"W       | <i>Gentry 17869</i> (MO)          |
| Colombia                                              | Chocó            | Tutunendo                             | 05°45'00"N, 76°31'59"W       | <i>Archer 2142</i> (AMES)         |
| Colombia                                              | Chocó            | Río Negro, Quibdó-Tutunendo           | 05°44'10.37"N, 76°34'37.59"W | <i>Cuatrecasas 24214</i> (US)     |
| Colombia                                              | Valle del Cauca  | Buenaventura                          | 03°52'48"N, 77°01'52"W       | <i>Alston 8620</i> (P)            |
| Colombia                                              | Valle del Cauca  | Buenaventura                          | 03°49'53"N, 77°14'57"W       | Camilo E. E. Garcia (iNaturalist) |
| Colombia                                              | Valle del Cauca  | Buenaventura                          | 03°49'43.38"N, 77°03'48.21"W | <i>Core 1505</i> (US)             |

|                                                    |                 |                                                     |                              |                                |
|----------------------------------------------------|-----------------|-----------------------------------------------------|------------------------------|--------------------------------|
| Colombia                                           | Valle del Cauca | Buenaventura                                        | 03°55'00"N, 77°02'00"W       | <i>Gentry 47989</i> (MO)       |
| Colombia                                           | Valle del Cauca | Buenaventura                                        | 03°46'19.92"N, 76°41'21.64"W | <i>Idrobo 1766</i> (COL)       |
| Colombia                                           | Valle del Cauca | Buenaventura                                        | 03°55'00"N, 77°19'06"W       | Joel T.O. Ospina (iNaturalist) |
| Colombia                                           | Valle del Cauca | Buenaventura                                        | 03°52'52"N, 76°52'00"W       | <i>Killip 34913</i> (F)        |
| Colombia                                           | Valle del Cauca | Buenaventura                                        | 03°55'00"N, 77°00'00"W       | <i>Monsalve 1787</i> (MO)      |
| Colombia                                           | Valle del Cauca | Buenaventura                                        | 03°33'25"N, 76°52'19"W       | Sasha Robinson (iNaturalist)   |
| Colombia                                           | Valle del Cauca | Buenaventura                                        | 03°57'14"N, 76°59'43"W       | Sonia Camargo (iNaturalist)    |
| Colombia                                           | Valle del Cauca | Buenaventura                                        | 30°59'00"N, 76°57'00"W       | <i>van Rooden 626</i> (COL)    |
| Colombia                                           | Valle del Cauca | Córdoba                                             | 03°52'27.54"N, 76°55'41.74"W | <i>Killip 33375</i> (AMES)     |
| <b><i>C. rosea</i> var. <i>guianensis</i> (23)</b> |                 |                                                     |                              |                                |
| French Guiana                                      |                 | Badoeul                                             | 04°55'00.31"N, 52°19'47.58"W | <i>Broadway 920</i> (GH)       |
| French Guiana                                      |                 | Bassin du Marouini                                  | 02°22'59"N, 53°46'00"W       | <i>Granville 11732</i> (P)     |
| French Guiana                                      |                 | Estuaire de l'Oyapock                               | 04°12'51"N, 51°50'31"W       | <i>Granville 4294</i> (P)      |
| French Guiana                                      |                 | Haut Oyapock                                        | 02°14'42"N, 52°52'38"W       | <i>Sastre 4723</i> (P)         |
| French Guiana                                      |                 | Haute Crique Armontabo                              | 03°42'15"N, 51°58'30"W       | <i>Granville 4334</i> (P)      |
| French Guiana                                      |                 | Kaw                                                 | 04°46'59"N, 52°21'00"W       | <i>Pignal 1968</i> (P)         |
| French Guiana                                      |                 | Maripasoula                                         | 02°13'40"N, 54°28'10"W       | <i>Poncy 2853</i> (P)          |
| French Guiana                                      |                 | Mitaraka Sud                                        | 02°16'00"N, 54°31'00"W       | <i>Sarthou 913</i> (P)         |
| French Guiana                                      |                 | Mont Saint-Marcel                                   | 02°23'00"N, 53°00'20"W       | <i>Granville 15307</i> (P)     |
| French Guiana                                      |                 | Montagne des Nouragues                              | 04°03'00"N, 52°42'00"W       | <i>Larpin 865</i> (P)          |
| French Guiana                                      |                 | Monts Bakra                                         | 03°18'00"N, 52°57'00"W       | <i>Cremers 13039</i> (P)       |
| French Guiana                                      |                 | Naneibo Road, 1 km W of<br>Cayenne Regina Highway   | 04°42'59"N, 53°24'00"W       | <i>Croat 74326</i> (MO)        |
| French Guiana                                      |                 | Nouragues Field Station                             | 04°03'00"N, 52°42'00"W       | <i>Smith 4157</i> (MO)         |
| French Guiana                                      |                 | Piste de St. Elie, km 16                            | 04°49'23"N, 53°16'34"W       | <i>Prévost 1280</i> (P)        |
| French Guiana                                      |                 | Piste de St. Elie-Interfluve<br>Sinnamary-Counamama | 05°16'59"N, 53°03'00"W       | <i>Prévost 4169</i> (P)        |
| French Guiana                                      |                 | Route de l'Est, piste vers<br>Nancibo               | 04°40'18"N, 52°25'21"W       | <i>Prévost 1847</i> (P)        |
| French Guiana                                      |                 | Savannas of Gallion                                 | 04°46'55"N, 52°24'41"W       | <i>Mori 25205</i> (NY)         |

|                               |            |                        |                        |                                  |
|-------------------------------|------------|------------------------|------------------------|----------------------------------|
| French Guiana                 | Cayenne    | Kourou                 | 04°55'16"N, 52°36'47"W | vanilendil (iNaturalist)         |
| French Guiana                 | Cayenne    | Montsinéry-Tonnégrande | 04°49'34"N, 52°29'53"W | olivier_fortune (iNaturalist)    |
| French Guiana                 | Cayenne    | Régina (-Kaw)          | 04°05'47"N, 52°41'00"W | Guillaume Delaitre (iNaturalist) |
| French Guiana                 | Cayenne    | Régina (-Kaw)          | 04°05'46"N, 52°41'01"W | Guillaume Delaitre (iNaturalist) |
| French Guiana                 | Cayenne    | Roura                  | 04°37'28"N, 52°21'40"W | lo_dcoco (iNaturalist)           |
| French Guiana                 | Cayenne    | Village Eskol          | 04°45'00"N, 52°19'59"W | <i>Cremers 9830 (P)</i>          |
| <b><i>C. tamboana</i> (2)</b> |            |                        |                        |                                  |
| Ecuador                       | Esmeraldas | San Lorenzo            | 00°54'59"N, 78°27'59"W | <i>Carnevali 3416 (MO)</i>       |
| Ecuador                       | Esmeraldas | San Lorenzo            | 00°49'59"N, 78°31'59"W | <i>Rubio 711 (MO)</i>            |

---

\* Collection with *C. castaneoides* var. *castaneoides* and *C. castaneoides* var. *augusta*.

\*\* Collection of *C. rosea* mixed with *C. tenuis*
