# Supplementary material
Source: publisher figshare collection journal article supplement (https://tandf.figshare.com/articles/dataset/_/23182704)
Supplement: Supplementary file 3 [file 1]

Archive with 7 entries (7 files):
- tsab_a_2207575_sm5795.pdf
- tsab_a_2207575_sm5794.pdf
- tsab_a_2207575_sm5793.pdf
- tsab_a_2207575_sm5792.pdf
- tsab_a_2207575_sm5791.pdf
- tsab_a_2207575_sm5790.pdf
- tsab_a_2207575_sm5789.pdf
