# Supplementary material
Source: publisher figshare collection journal article supplement (https://tandf.figshare.com/articles/dataset/_/23182704)
Supplement: Supplementary file 3 [file 1 › tsab_a_2207575_sm5789.pdf]

**Appendix 4.** Records of *Cleistes rosea* and related taxa used in morphometric analyses. Same voucher indicates different individuals from the same collection/herbarium sample.

| Taxa/N/Country               | State/Department | Municipality/Locality       | Voucher                              |
|------------------------------|------------------|-----------------------------|--------------------------------------|
| <i>Cleistes abdita</i> (20)  |                  |                             |                                      |
| Brazil                       | Roraima          | Caracaraí                   | <i>Barbosa 1184</i> (INPA)           |
| Brazil                       | Roraima          | Caracaraí                   | <i>Barbosa 1184</i> (UEC)            |
| Brazil                       | Roraima          | Caracaraí                   | <i>Barbosa 1224</i> (INPA)           |
| Brazil                       | Roraima          | Caracaraí                   | <i>Barbosa 1224</i> (UEC)            |
| Brazil                       | Roraima          | Caracaraí                   | <i>Barbosa 1423</i> (INPA)           |
| Brazil                       | Roraima          | Caracaraí                   | <i>Barbosa 1423</i> (INPA)           |
| Brazil                       | Roraima          | Caracaraí                   | <i>Barbosa 1423</i> (INPA)           |
| Brazil                       | Roraima          | Caracaraí                   | <i>Barbosa 1423</i> (UEC)            |
| Brazil                       | Roraima          | Caracaraí                   | <i>Cavalcanti 198</i> (INPA)         |
| Guyana                       | Cuyuni-Mazaruni  | Wayalayeng Village          | <i>Clarke 12160</i> (US)             |
| Guyana                       | Takutu-Essequibo | Gunn's Wai Wai Village      | <i>Henkel 5251</i> (US)              |
| Guyana                       | Takutu-Essequibo | Gunn's Wai Wai Village      | <i>Henkel 5251</i> (US)              |
| Venezuela                    | Amazonas         | 1 km E of Maroa             | <i>Wurdack 43272</i> (NY)            |
| Venezuela                    | Amazonas         | Átures                      | <i>Carnevali 2661</i> (PORT) isotype |
| Venezuela                    | Amazonas         | Átures                      | <i>Carnevali 2661</i> (VEN) holotype |
| Venezuela                    | Amazonas         | Sabana Cumare               | <i>Wurdack 43763</i> (NY)            |
| Venezuela                    | Amazonas         | Sabana Cumare               | <i>Wurdack 43763</i> (NY)            |
| Venezuela                    | Amazonas         | Sabana de San Juan de Ucata | <i>Romero 2410</i> (AMES)            |
| Venezuela                    | Bolívar          | 2 km S of Rio Chibau        | <i>Maguire 53520</i> (AMES)          |
| Venezuela                    | Amazonas         | Átures                      | <i>Carnevali 2662</i> (VEN)          |
| <i>C. ayangannensis</i> (17) |                  |                             |                                      |
| Brazil                       | Amazonas         | Santa Isabel do Rio Negro   | <i>Forzza 7145</i> (RB)              |
| Brazil                       | Amazonas         | Santa Isabel do Rio Negro   | <i>Mello-Silva 4244</i> (RB)         |
| Guyana                       | Cuyuni-Mazaruni  | Mount Ayanganna             | <i>Pipoly 11174</i> (COL) holotype   |
| Guyana                       | Cuyuni-Mazaruni  | Mount Ayanganna             | <i>Pipoly 11174</i> (GH) isotype     |
| Guyana                       | Cuyuni-Mazaruni  | Mount Ayanganna             | <i>Pipoly 11174</i> (NY) isotype     |

|                                                      |                  |                         |                                       |
|------------------------------------------------------|------------------|-------------------------|---------------------------------------|
| Guyana                                               | Cuyuni-Mazaruni  | Pakaraima Mountains     | <i>Henkel 63 (US)</i>                 |
| Guyana                                               | Cuyuni-Mazaruni  | Paruima                 | <i>Clarke 5729 (NY 04027155)</i>      |
| Guyana                                               | Cuyuni-Mazaruni  | Paruima                 | <i>Tillett 44944 (NY 04027158)</i>    |
| Guyana                                               | Potaro           | River Region            | <i>Boom 9038 (NY)</i>                 |
| Guyana                                               | Potaro           | River Region            | <i>Boom 9038 (NY)</i>                 |
| Guyana                                               | Potaro-Siparuni  | Mount Wokomung          | <i>Clarke 10730 (AMES)</i>            |
| Venezuela                                            | Amazonas         | Cumbre del Aprada-tepui | <i>Maguire 37232 (NY)</i>             |
| Venezuela                                            | Bolívar          | Chimantá Massif         | <i>Steryermark 74849 (AMES)</i>       |
| Venezuela                                            | Bolívar          | Chimantá Massif         | <i>Steyermark 74849 (NY 04027162)</i> |
| Venezuela                                            | Bolívar          | Ilu-Tepui               | <i>Maguire 33460 (AMES)</i>           |
| Venezuela                                            | Bolívar          | Ilu-Tepui               | <i>Maguire 33460 (AMES)</i>           |
| Venezuela                                            | Bolívar          | Piar                    | <i>Huber 9573 (NY)</i>                |
| <b><i>C. castaneoides var. castaneoides (27)</i></b> |                  |                         |                                       |
| Brazil                                               | Bahia            | Lençóis                 | <i>Carvalho 1071 (K)</i>              |
| Brazil                                               | Bahia            | Maraú                   | <i>Belem 3542 (NY)</i>                |
| Brazil                                               | Bahia            | Rio de Contas           | <i>Harley 15613 (CEPEC)</i>           |
| Brazil                                               | Distrito Federal | Brasília                | <i>Bianchetti 1480 (CEN)</i>          |
| Brazil                                               | Distrito Federal | Brasília                | <i>Bianchetti 819 (CEN)</i>           |
| Brazil                                               | Distrito Federal | Brasília                | <i>Bianchetti 819 (CEN)</i>           |
| Brazil                                               | Goiás            | Cavalcante              | <i>Batista 829 (CEN)</i>              |
| Brazil                                               | Goiás            | Cavalcante              | <i>Batista 829 (CEN)</i>              |
| Brazil                                               | Goiás            | Cavalcante              | <i>Batista 829 (CEN)</i>              |
| Brazil                                               | Goiás            | Minaçu                  | <i>Walter 711 (CEN)</i>               |
| Brazil                                               | Goiás            | Pirenópolis             | <i>Chacon 1719 (HEPH)</i>             |
| Brazil                                               | Goiás            | São Gabriel de Goiás    | <i>Batista 3472 (BHCB)</i>            |
| Brazil                                               | Distrito Federal | Brasília                | <i>Batista s.n. (CEN 25379)</i>       |
| Brazil                                               | Pará             | Vigia                   | <i>Andrade-Lima53-1262 (K)</i>        |
| Brazil                                               | Pará             | Vigia                   | <i>Pabst 8962 (K)</i>                 |
| Brazil                                               | Minas Gerais     | Santana do Riacho       | <i>Batista 1780 (BHCB)</i>            |
| Brazil                                               | Minas Gerais     | Santana do Riacho       | <i>Batista 1780 (BHCB)</i>            |

|                                                        |              |                          |                                                     |
|--------------------------------------------------------|--------------|--------------------------|-----------------------------------------------------|
| Brazil                                                 | Paraná       | Palmeira                 | <i>Silva 9947</i> (MBM)                             |
| Brazil                                                 | São Paulo    | São Paulo                | <i>Hoehne s.n.</i> (SP 28697) lectotype             |
| Brazil                                                 | São Paulo    | São Paulo                | <i>Hoehne s.n.</i> (SP 28697) lectotype             |
| Brazil                                                 | São Paulo    | São Paulo                | <i>Hoehne s.n.</i> (AMES 02158301) isoelectotype    |
| Brazil                                                 | São Paulo    | São Paulo                | <i>Hoehne s.n.</i> (F V0435954) isoelectotype       |
| Brazil                                                 | São Paulo    | São Paulo                | <i>Hoehne s.n.</i> (NY 00414849) isoelectotype      |
| Brazil                                                 | São Paulo    | São Paulo                | <i>Hoehne s.n.</i> (NY 00414849) isoelectotype      |
| Brazil                                                 | São Paulo    | São Paulo                | <i>Luederwaldt s.n.</i> (SP 28995) syntype          |
| Brazil                                                 | São Paulo    | São Paulo                | <i>Luederwaldt s.n.</i> (SP 28995) syntype          |
| Colombia                                               | Guaviare     | San José de Guaviare     | <i>Castro 189</i> (COL)                             |
| <b><i>C. castaneoides</i> var. <i>augusta</i> (26)</b> |              |                          |                                                     |
| Brazil                                                 | Bahia        | Ituberá                  | <i>Batista 3426</i> (BHCB)                          |
| Brazil                                                 | Goiás        | Águas Lindas de Goiás    | <i>Miranda 68</i> (CEN)                             |
| Brazil                                                 | Goiás        | Pirenópolis              | <i>Batista 175</i> (CEN)                            |
| Brazil                                                 | Goiás        | Pirenópolis              | <i>Batista 175</i> (CEN)                            |
| Brazil                                                 | Goiás        | Pirenópolis              | <i>Batista 175</i> (CEN)                            |
| Brazil                                                 | Goiás        | Pirenópolis              | <i>Batista 238</i> (CEN)                            |
| Brazil                                                 | Goiás        | Pirenópolis              | <i>Batista 238</i> (CEN)                            |
| Brazil                                                 | Maranhão     | Carolina                 | <i>Oliveira 264</i> (CEN)                           |
| Brazil                                                 | Mato Grosso  | 1.5 km E.S.E. Base Camp. | <i>Philcox 3503</i> (K)                             |
| Brazil                                                 | Mato Grosso  | Cuiabá                   | <i>Hatschbach 37342</i> (MBM)                       |
| Brazil                                                 | Mato Grosso  | Salto Augusto            | <i>Hoehne 5353</i> (R) lectotype                    |
| Brazil                                                 | Minas Gerais | Diamantina               | <i>Menezes 1</i> (ESA) <i>C. angeliana</i> holotype |
| Brazil                                                 | Minas Gerais | Santana do Riacho        | <i>Martins 15</i> (BHCB)                            |
| Brazil                                                 | Minas Gerais | Santana do Riacho        | <i>Martins 15</i> (BHCB)                            |
| Brazil                                                 | Minas Gerais | São Gonçalo do Rio Preto | <i>Viana 1397</i> (BHCB)                            |
| Brazil                                                 | Minas Gerais | Serro                    | <i>Batista 1959</i> (BHCB)                          |
| Brazil                                                 | Minas Gerais | Serro                    | <i>Batista 1959</i> (BHCB)                          |
| Brazil                                                 | Minas Gerais | Serro                    | <i>Mota 2615</i> (BHCB)                             |
| Brazil                                                 | Pará         | Serra do Cachimbo        | <i>Pires 6084</i> (NY)                              |

|                                               |                 |                          |                                                                 |
|-----------------------------------------------|-----------------|--------------------------|-----------------------------------------------------------------|
| Brazil                                        | Pará            | Serra do Cachimbo        | <i>Pires 6084</i> (NY)                                          |
| Brazil                                        | Pará            | Serra do Cachimbo        | <i>Pires 6084</i> (NY)                                          |
| Colombia                                      | Amazonas        | Aeropuerto de Araracuara | <i>Idrobo 8982</i> (COL)                                        |
| Colombia                                      | Guainía         | Inírida                  | <i>Cardenas 14926</i> (COAH)                                    |
| Colombia                                      | Guainía         | Inírida                  | <i>Cardenas 16780</i> (COAH)                                    |
| Peru                                          | San Martín      | Rioja                    | <i>Woytkowski 6228</i> (MO)                                     |
| Peru                                          | San Martín      | Rioja                    | <i>Woytkowski 6228</i> (MO)                                     |
| <b><i>C. rosea</i> var. <i>rosea</i> (53)</b> |                 |                          |                                                                 |
| Brazil                                        | Pará            | Bela Vista               | <i>Ducke 18728</i> (RB)                                         |
| Brazil                                        | Roraima         | Boa Vista                | <i>Silva 431</i> (INPA)                                         |
| Brazil                                        | Roraima         | Boa Vista                | <i>Silva 431</i> (NY)                                           |
| Brazil                                        | Roraima         | Boa Vista                | <i>Silva 431</i> (NY)                                           |
| Colombia                                      | Amazonas        | Corregimiento            | <i>Jaimes 1474</i> (COAH)                                       |
| Colombia                                      | Antioquia       | Guatapé                  | <i>Escobar 6826</i> (HUA)                                       |
| Colombia                                      | Antioquia       | San Rafael               | <i>Carmona 1111</i> (HUA)                                       |
| Colombia                                      | Antioquia       | Vereda Barro Blanco      | <i>Bedoya 200</i> (HUA)                                         |
| Colombia                                      | Caquetá         | Florencia                | <i>Castaño 3184</i> (COAH )                                     |
| Colombia                                      | Cundinamarca    | Fusagasugá               | <i>Garcia-Barriga 21236</i> (COL)                               |
| Colombia                                      | Cundinamarca    | San Francisco            | <i>Garcia-Barriga 10967</i> (COL)                               |
| Colombia                                      | Cundinamarca    | Sasaima                  | <i>Garcia-Barriga 17269</i> (NY)                                |
| Colombia                                      | Cundinamarca    | Sasaima                  | <i>Garcia-Barriga 17269</i> (NY)                                |
| Colombia                                      | Cauca           | El Tambo                 | <i>Sneidern 104</i> (S)                                         |
| Colombia                                      | Cauca           | El Tambo                 | <i>Sneidern 104</i> (S)                                         |
| Colombia                                      | Huila           |                          | <i>Renz 3847</i> (RENZ)                                         |
| Colombia                                      | Valle del Cauca | Pavas                    | <i>Pennel 5495</i> (AMES)                                       |
| Colombia                                      | Valle del Cauca | Cali                     | <i>Aboucher s.n.</i> (COL 119652) <i>C. aboucharii</i> holotype |
| Colombia                                      | Vaupés          | Río Papurí               | <i>Schultes 19485</i> (AMES)                                    |
| Ecuador                                       | Napo-Pastaza    | Cashurco                 | <i>Asplund 19351</i> (AMES)                                     |
| Guyana                                        | Cuyuni-Mazaruni | Kamakusa Mountain        | <i>Wurdack 5897</i> (AMES)                                      |
| Guyana                                        | Cuyuni-Mazaruni | Kamakusa Mountain        | <i>Wurdack 5897</i> (AMES)                                      |

|                     |                        |                        |                             |
|---------------------|------------------------|------------------------|-----------------------------|
| Guyana              | Cuyuni-Mazaruni        | Merume Mountains       | <i>Maguire 43840 (F)</i>    |
| Guyana              | Cuyuni-Mazaruni        | Merume Mountains       | <i>Maguire 43840 (NY)</i>   |
| Guyana              | Cuyuni-Mazaruni        | Pakaraima Mountains    | <i>Hoffman 1946 (GH)</i>    |
| Guyana              | Cuyuni-Mazaruni        | Pakaraima Mountains    | <i>Hoffman 1946 (NY)</i>    |
| Guyana              | Demerara-Mahaica       | St. Cuthbert's Mission | <i>Mori 8033 (NY)</i>       |
| Guyana              | Mazaruni-Potaro        | Pakaraima Mountains    | <i>Pipoly 7890 (NY)</i>     |
| Guyana              | Potaro-Siparuni        | Kopinang Savanna       | <i>Maguire 46091A (NY)</i>  |
| Guyana              | Potaro-Siparuni        | Kopinang Savanna       | <i>Maguire 46091A (NY)</i>  |
| Guyana              | Potaro-Siparuni        | Kopinang Savanna       | <i>Maguire 46091A (NY)</i>  |
| Guyana              | Potaro-Siparuni        | Kopinang Savanna       | <i>Maguire 46091A (NY)</i>  |
| Guyana              | Potaro-Siparuni        | Kopinang-Orinduik      | <i>Boom 9289 (NY)</i>       |
| Guyana              | Potaro-Siparuni        | Mount Ayanganna        | <i>Maguire 40623 (AMES)</i> |
| Guyana              | Potaro-Siparuni        | Mount Ayanganna        | <i>Maguire 40623 (NY)</i>   |
| Guyana              | Potaro-Siparuni        | Mount Ayanganna        | <i>Maguire 40623 (NY)</i>   |
| Guyana              | Potaro-Siparuni        | Pakaraima Mountains    | <i>Henkel 1592 (NY)</i>     |
| Guyana              | Potaro-Siparuni        | Pakaraima Mountains    | <i>Henkel 1592 (U)</i>      |
| Guyana              | Potaro-Siparuni        | Pakaraima Mountains    | <i>Henkel 5536 (NY)</i>     |
| Guyana              | Potaro-Siparuni        | Pakaraima Mountains    | <i>Henkel 5536 (NY)</i>     |
| Guyana              | Potaro-Siparuni        | Pakaraima Mountains    | <i>Maguire 46030A (NY)</i>  |
| Guyana              | Upper Demerara-Berbice | Lower Kajarau Creek    | <i>Henkel 2152 (COL)</i>    |
| Guyana              | Upper Demerara-Berbice | Lower Kajarau Creek    | <i>Henkel 2152 (GH)</i>     |
| Guyana              | Upper Demerara-Berbice | Lower Kajarau Creek    | <i>Henkel 2152 (NY)</i>     |
| Panama              | Panamá                 | Cerro Azul             | <i>Dwyer 2059 (MO)</i>      |
| Trinidad and Tobago | Trinidad               | Valencia-Sangre Grande | <i>Freeman 10782 (NY)</i>   |
| Venezuela           | Aragua                 | Tovar                  | <i>Fendler 1551 (AMES)</i>  |
| Venezuela           | Bolívar                | Km 118 S of El Dorado  | <i>Gentry 10577 (MO)</i>    |
| Venezuela           | Tachira                |                        | <i>Renz 7108 (RENZ)</i>     |
| Venezuela           | Tachira                |                        | <i>Renz 7226 (RENZ)</i>     |
| Venezuela           | Tachira                |                        | <i>Renz 7226 (RENZ)</i>     |

|                                                       |                 |                     |                                                           |
|-------------------------------------------------------|-----------------|---------------------|-----------------------------------------------------------|
| Venezuela                                             | Táchira         | Uribante            | <i>Dorr 7116</i> (NY)                                     |
| Venezuela                                             | Trujillo        |                     | <i>Renz 4275</i> (RENZ)                                   |
| <b><i>C. rosea</i> var. <i>buenaventurae</i> (24)</b> |                 |                     |                                                           |
| Colombia                                              | Chocó           | La Oveja-Quibdó     | <i>Archer 1751</i> (US)                                   |
| Colombia                                              | Chocó           | La Oveja-Quibdó     | <i>Archer 1751</i> (US)                                   |
| Colombia                                              | Chocó           | Tutunendo           | <i>Archer 2142</i> (US)                                   |
| Colombia                                              | Valle del Cauca | Buenaventura        | <i>Alston 8620</i> (F) <i>C. buenaventurae</i> isotype    |
| Colombia                                              | Valle del Cauca | Buenaventura        | <i>Alston 8620</i> (P) <i>C. buenaventurae</i> isotype    |
| Colombia                                              | Valle del Cauca | Buenaventura        | <i>Alston 8620</i> (P) <i>C. buenaventurae</i> isotype    |
| Colombia                                              | Valle del Cauca | Buenaventura        | <i>Alston 8620</i> (U) <i>C. buenaventurae</i> holotype   |
| Colombia                                              | Valle del Cauca | Buenaventura        | <i>Asplund 4994</i> (MO)                                  |
| Colombia                                              | Valle del Cauca | Buenaventura        | <i>Haught 5338</i> (COL)                                  |
| Colombia                                              | Valle del Cauca | Buenaventura        | <i>Haught 5338</i> (US)                                   |
| Colombia                                              | Valle del Cauca | Buenaventura        | <i>Killip 34913</i> (AMES)                                |
| Colombia                                              | Valle del Cauca | Buenaventura        | <i>Killip 34913</i> (AMES)                                |
| Colombia                                              | Valle del Cauca | Buenaventura        | <i>Killip 34913</i> (COL)                                 |
| Colombia                                              | Valle del Cauca | Buenaventura        | <i>Killip 34913</i> (COL)                                 |
| Colombia                                              | Valle del Cauca | Buenaventura        | <i>Killip 34913</i> (COL)                                 |
| Colombia                                              | Valle del Cauca | Buenaventura        | <i>Killip 34913</i> (COL)                                 |
| Colombia                                              | Valle del Cauca | Buenaventura        | <i>Killip 34913</i> (F)                                   |
| Colombia                                              | Valle del Cauca | Buenaventura        | <i>Killip 34913</i> (US)                                  |
| Colombia                                              | Valle del Cauca | Buenaventura        | <i>Killip 34913</i> (US)                                  |
| Colombia                                              | Valle del Cauca | Buenaventura        | <i>Gentry 47989</i> (MO)                                  |
| Colombia                                              | Valle del Cauca | Buenaventura        | <i>Raugh-Hink B16</i> (AMES) <i>C. romeroana</i> holotype |
| Colombia                                              | Valle del Cauca | Córdoba             | <i>Killip 33375</i> (AMES)                                |
| Colombia                                              | Valle del Cauca | Córdoba             | <i>Killip 33375</i> (COL)                                 |
| Colombia                                              | Valle del Cauca | Córdoba             | <i>Killip 33375</i> (US)                                  |
| <b><i>C. rosea</i> var. <i>guianensis</i> (20)</b>    |                 |                     |                                                           |
| French Guiana                                         | Sinnamary       | Route de Petit Saut | <i>Sambin 1254</i> (CAY) paratype                         |
| French Guiana                                         | Sinnamary       | Route de Petit Saut | <i>Sambin 1256</i> (CAY) holotype                         |

|                               |            |                                    |                                    |
|-------------------------------|------------|------------------------------------|------------------------------------|
| French Guiana                 |            | Chemin de Saut Pararé              | <i>Smith 4157 (CAY)</i>            |
| French Guiana                 |            | Haut Oyapock                       | <i>Sastre 4723 (P)</i>             |
| French Guiana                 |            | Kaw                                | <i>Pignal 1968 (P)</i>             |
| French Guiana                 |            | Kourou, Matiti                     | <i>Sambin 1052 (HJBG)</i>          |
| French Guiana                 |            | Maripasoula                        | <i>Poncy 2853 (P)</i>              |
| French Guiana                 |            | Monts Bakra                        | <i>Cremers 13039 (NY)</i>          |
| French Guiana                 |            | Monts Bakra                        | <i>Cremers 13039 (P)</i>           |
| French Guiana                 |            | Cayenne Regina Highway             | <i>Croat 74326 (MO)</i>            |
| French Guiana                 |            | Piste de St. Elie, km 16           | <i>Prevost 1280 (P)</i>            |
| French Guiana                 |            | Route Cayenne - Régina             | <i>Geniez 93 (CAY)</i>             |
| French Guiana                 |            | Savane roche Virginie              | <i>Sambin 1032 (HJBG)</i>          |
| French Guiana                 |            | Savane-roche du Quatorze Juillet   | <i>Cremers 12160 (CAY)</i>         |
| French Guiana                 |            | Savannas of Gallion                | <i>Mori 25205 (NY)</i>             |
| French Guiana                 |            | crique Tibourou, bassin de l'Orapu | <i>Billiet 5722 (CAY)</i>          |
| French Guiana                 |            | crique Tibourou, bassin de l'Orapu | <i>Billiet 5722 (CAY)</i>          |
| French Guiana                 |            |                                    | <i>Gradstein s.n. (RENZ 14011)</i> |
| French Guiana                 |            |                                    | <i>Gradstein s.n. (RENZ 14011)</i> |
| French Guiana                 |            | station des Nouragues              | <i>Ulitzka 65 (CAY)</i>            |
| <b><i>C. tamboana</i> (5)</b> |            |                                    |                                    |
| Ecuador                       | Esmeraldas | Lita to Alto Tambo                 | <i>Hirtz 3458 (K)</i>              |
| Ecuador                       | Esmeraldas | San Lorenzo                        | <i>Rubio 711 (MO)</i>              |
| Ecuador                       | Esmeraldas | San Lorenzo                        | <i>Rubio 711 (MO)</i>              |
| Ecuador                       | Esmeraldas | San Lorenzo                        | <i>Carnevali 3416 (MO 029059)</i>  |
| Ecuador                       | Esmeraldas | San Lorenzo                        | <i>Carnevali 3416 (MO 029059)</i>  |

---
