# Supplementary material
Source: publisher figshare collection journal article supplement (https://tandf.figshare.com/articles/dataset/_/23182704)
Supplement: Supplementary file 3 [file 1 › tsab_a_2207575_sm5790.pdf]

## **Appendix 5.** Index to Scientific Names of *Cleistes rosea* and related taxa, and list of Exsiccatae

### **Index to Scientific Names of *Cleistes rosea* and related taxa**

(Accepted names indicated by boldface lettering. *Cleistes castaneoides* denotes specimens with unknown intraspecific identification)

***Cleistes abdita*** G.A.Romero & Carnevali (9)

*Cleistes aboucharii* Szlach., Kolan. & Baranow, 1

*Cleistes acuminata* Schltr., 1

*Cleistes angeliana* Campacci, 8

***Cleistes ayangannensis*** Szlach. & Baranow (5)

*Cleistes buenaventurae* Szlach. & Kolan., 2

***Cleistes castaneoides*** Hoehne (6)

***Cleistes castaneoides*** Hoehne var. ***augusta*** (Hoehne) J.A.N.Bat. & Pansarin (8)

***Cleistes castaneoides*** Hoehne var. ***castaneoides*** (7)

*Cleistes latiglossa* Hoehne, 7

*Cleistes latiglossa* Hoehne var. *alba* Hoehne, 8

*Cleistes latiplumis* Hoehne, 7

*Cleistes lehmannii* Kraenzl. ex Szlach. & Kolan, 2

*Cleistes romeroana* Szlach., Kolan. & Baranow, 2

*Cleistes rosea* Lindl. f. *augusta* (Hoehne) Meneguzzo & Van den Berg, 8

*Cleistes rosea* Lindl. f. *pallida* Carnevali & I.Ramírez, 9

***Cleistes rosea*** Lindl. var. ***buenaventurae*** (Szlach. & Kolan.) J.A.N.Bat. & C.Castro (2)

***Cleistes rosea*** Lindl. var. ***guianensis*** Sambin & J.A.N.Bat. (3)

***Cleistes rosea*** Lindl. var. ***rosea*** (1)

***Cleistes tamboana*** Dodson & Carnevali (4)

*Cleistes venusta* (Schltr.) Schltr., 1

*Epistephium monanthum* Poepp. & Endl., 1

*Pogonia acuminata* Schltr., 1

*Pogonia monantha* (Poepp. & Endl.) Schltr., 1

*Pogonia rosea* (Lindl.) Rchb.f., 1

*Pogonia rosea* (Lindl.) Hemsl., 1

*Pogonia rosea* (Lindl.) Rchb.f. var. *augusta* Hoehne, 8

*Pogonia venusta* Schltr., 1

### **Exsiccatae**

Abouchar, A. s.n. (COL000431381) (1)

Acevedo-Rodriguez, P. 11847 (3)

Acosta, M. et al. 44 (1)

Adams, C.D. et al. 14000 (1)

Albuquerque, B.W.P. et al 1394 (1)

Alson-Haran, J. 1125 (3)

Alston, A.H.G. 8620 (2)

Amaral, A.M. et al. 15 (6)

Andrade-Lima, D. 1261 (7), 53-1262 (7)

Arantes, A.A.A. et al. 1808 (6)

Archer, W.A. 1751 (2), 2142 (2)

Asplund, E. 19351 (1), 4994 (2)

Aymard, G. 9184 (9)

Azevedo, M.L.M. et al. 1297 (8)

Baker, R.E.D. s.n. (TRIN 13524) (1)

Barbosa, A.A.A. s.n. (HUFU 43237) (7), s.n. (HUFU 45459) (7)

Barbosa, T.D.M. & S.M. Costa 1184 (9), 1196 (7), 1197 (7), 1224 (9), 1423 (9)

Barnes, R. & Y.S. Comeau s.n. (TRIN 30725) (1)

Barona, A. et al. 1026 (1)

Barthelemy, D. s.n. (MPU-2633665) (3)

Batista, J.A.N. 35 (7), 175 (8), 238 (8), 280 (6), 513 (8), 598 (8), 642 (8), 820 (7), 829 (8), 951 (7), 1525 (7), 1780 (7), 1959 (8), 2359 (7), 3124 (8), 3357 (7), 3705 (8), s.n. (CEN 25379) (7)

Batista, J.A.N. & E.L. Borba 1668 (7)

Batista, J.A.N. & G.M.C. Lustre 3426 (8)

Batista, J.A.N. & K. Proite 1025 (7)

Batista, J.A.N. & K.F. Pellizzaro 1329 (7)

Batista, J.A.N. & P. Proite 3472 (7)

Bedoya, N. et al. 200 (1)

Beitel, J.M. 85195 (5)

Belém, R.P. 3542 (7)

Benavides, J.C. et al. 465 (1)

Betancur, J. et al. 16832 (1), 18294 (1)

Bianchetti, L.B. & J.A.N. Batista 819 (7)

Bianchetti, L.B. et al. 1480 (7)

Billiet, F. & B. Jadin 5722 (3)

Black, G.A. et al. 14218 (7), 57-19711 (1)

Boom, B.M. & G.J. Samuels 9038 (5), 9289 (1)

Bouças, P.R.P. 175 (1)

Broadway, W.E. 6653 (1), 920 (3)

Bues, C. s.n. (F V0435967F),

Cabrera, I. 2312 (7),

Campos Porto, P. 505 (6), 505 (7), 506 (6)

Cañas, D.A.G. s.n. (HUA 76164) (1)

Cárdenas, D. & F. Arenas 16780 (8)

Cárdenas, D. & P. Buchelli 14926 (8)

Cárdenas, D. et al. 18805 (9), 44325 (8), 50295 (1)

Carmona, M.J. 1111 (1)

Carnevali, G. & C.H. Dodson 3416 (4)

Carnevali, G. et al. 2661 (9), 2662 (9)

Carvajal, L. et al. 390 (1)

Carvalho, A.M. et al. 1071 (7)

Castano, N. et al. 3184 (1)

Castro, C. et al. 189 (7)

Cavalcanti, D. et al. 198 (9)

Cezare, C.H.G. et al. 563 (8)

Chacon, R.G. et al. 1719 (7)

Chauvet, G. & G. Chiron 45 (3)

Clarke, H.D. et al. 10730 (5), 12160 (9), 5729 (5)

Coêlho, L. 2 (1)

Coêlho, L.F. et al. 938 (1)

Conceição, A.A. 1138 (8)

Core, E.L. 1505 (2)

Costa, F.N. et al. 1180 (8)

Cowan, R.S. & T. R. Soderstrom 1778 (1), 1971 (1), 2214 (1)  
Cremers, G. & M. Hoff 11375 (3)  
Cremers, G. & P. Pétronelli 11847 (3)  
Cremers, G. 5770 (3), 9438 (3), 9457 (3), 9830 (3), 12160 (3), 13039 (382), 15272 (3)  
Croat, T. 74326 (3)  
Crueger, H. s.n. (TRIN 1830) (1)  
Cuatrecasas, J. & M. Llano 24214 (2)  
Dantas, M. 944 (1)  
David, H. et al. 4299 (1), 4545 (1)  
Davidse, G. et al. 17545 (7), 17704 (7), 17758 (7), 17876 (7)  
Delnatte, C. & L.C. Santamaria 1732 (3)  
Delnatte, C. et al. 1138 (3)  
Delprete, P.G. et al. 10004 (7)  
DeWolf, G.P. & L. Aristeguieta 2130 (1)  
Dorr, L.J. et al. 7116 (1)  
Ducke, A. s.n. (RB 18703) (1), s.n. (RB 18728) (1)  
Duke, J.A. & H.W. Mussell 6592A (1)  
Dunn, H. 2758 (1)  
Duno, R. & F. Teran 35 (1)  
Dwyer, J.D. 2059 (1)  
Egler, W. s.n. (RB 59974), (7)  
Equipe do Jardim Botânico de Brasília 1067 (7), 1074 (7)  
Escobar, L.A. et al. 6826 (1)  
Fendler, A. 1551 (1)  
Fernández-Alonso, J.L. & S. Albesiano 24301 (1)  
Feuillet, C. 841 (3), 1430 (3), 3005 (3), 3624 (3), 4589 (3)  
Fideli, A.T. 9 (8)  
Fittkau, E.J. s.n. (INPA0012917) (1)  
Fonnegra, G.R. et al. 5833 (1)  
Fonseca, M.L. & D. Alvarenga 3967 (7), 4014 (7)  
Forero, E. et al. 1139 (2), 6125 (1)  
Forzza, R.C. et al. 7145 (5), 8015 (1)  
Fournet, A. 154 (3)  
Freeman, W.G. 10782 (1)

Fróes, R.L. 27838 (6)

Funck, N. 634 (1)

García-Barriga, H. 8409 (1), 10967 (1), 17269 (1), 21236 (1)

García-Barriga, H. et al. 15842 (9)

Gates, B. & Estabrook 49 (8)

Geniez, C. & D. Sabatier 93 (3)

Gentry, A.H. et al. 10577 (1), 47989 (2)

Gentry, A.L. & M. Fallen 17869 (2)

Glaziou, A.F.M. 22170 (6)

Gómez, C.C.P. et al. 135 (1)

Gonzalez, S. 2380 (3)

Gradstein, R. s.n. (RENZ 14011) (3)

Granville, J.J. de 11732 (3), 3375 (3), 4294 (3), 4334 (3)

Granville, J.J. de et al. 15025 (3), 15307 (3), 15933 (3)

Granville, J.J. de & F. Crozier 16516 (3)

Granville, J.J. de & G. Cremers 12959 (3)

Grenand, P. 1217 (3)

Guarín, M.I. 66 (1)

Hahn, W.J. et al. 4372 (5), 4467 (1)

Harley, R.M. et al. 15613 (7)

Hatschbach, G. et al. 35973 (8), 37342 (8), 58410 (7), 63048 (8), 64274 (8), 64353 (8), 64540 (8)

Haught, O. 5338 (2)

Henkel, T.W. et al. 898 (1), 1592 (1), 5251 (9), 5536 (1), 6516 (1)

Henkel, T.W. & B. Hoffman 63 (5)

Henkel, T.W. & R. Williams 2152 (1)

Heringer, E.P. 9687 (7), 9979 (7), 10555 (6), 11308 (6)

Hirtz, A. 3458 (4)

Hoehne, F.C. s.n. (SP 28697) (7)

Hoehne, F.C. sub Comissão Rondon 5328 (7), 5329 (7), 5352 (8), 5353 (8)

Hoffman, B. et al. 1946 (1)

Huber, O. 6197 (7), 8264 (9), 9573 (5)

Huber, O. & C. Alarcon 7762 (5)

Idrobo, J.M. 1766 (2), 8982 (8)

Irwin, H.S. et al. 12392 (7), 34538 (6), 34545 (8)  
Jaimes, M.S. et al. 1269 (1), 1474 (1)  
Jansen-Jacobs, M.J. et al. 5133 (3)  
Jesus, F.P.R. 283 (8)  
Johnson, W. et al. 764 (1)  
Kanehira, R. 325 (1)  
Kapuler, A. & V. Hascall 70 (1)  
Killip, E.P. & H. Garcia 33375 (2)  
Killip, E.P. 34913 (2)  
Knapp, S.D. & J. Mallet 5192 (1)  
Langenheim, J.H. 3316 (1)  
Larpin, D. 865 (3)  
Lasser, T. 1821 (1)  
Lehmann, F.C. 752 (2), 8861 (1)  
Leprieur, F.R. 106 (3), s.n. (P00367102) (3), s.n. (P00367149) (3)  
Liesner, R.L. 8565 (1), 19701 (9), 24365 (7)  
Linden, J. 1475 (1)  
Luederwaldt, H. s.n. (SP 28995) (7)  
Maguire, B. 33460 (5)  
Maguire, B. et al. 37232 (5), 40623 (1), 42140 (5), 43840 (1), 46030A (1), 46091A (1), 53520 (9), s.n. (NY 04027186) (1)  
Martins, C.A.N. et al. 15 (8)  
McDowell, T. & D. Gopaul 2855 (1), 2885 (1)  
Mello-Silva, R. et al. 4244 (5)  
Meneguzzo, T.E.C. et al. 44 (7)  
Menezes, E. EM-001 (8)  
Mickeliunas, L. & E.R. Pansarin 8 (6)  
Milliken, W. 367 (1)  
Miranda, Z.J.G. 49 (7), 68 (8), 91 (7)  
Molino, J.F. & D. Sabatier 2388 (3)  
Monsalve Benavides, M. 1787 (2)  
Mori, S.A. et al. 8033 (1), 25205 (3)  
Mota, R.C. da 2615 (8)  
Munhoz, C.B.R. et al. 2255 (7), 2327 (7), 2355 (7), 2363 (8)

Oliveira, G.C. 1505 (7), 1589 (7), 1808 (7)  
Oliveira, R.S. 41 (7), 49 (7)  
Oliveira, R.S. & E. Gonçalves 264 (8)  
Orozco, C.I. et al. 452 (1)  
Pabst, G.F.J. 8962 (7)  
Pansarin, E.R. & J.A.N. Batista 740 (7), 743 (7), 750 (7), 753 (7), 762 (6)  
Pansarin, E.R. & L. Mickeliunas 861 (6), 868 (7), 873 (7, 8), 888 (7, 8), 889 (6), 897 (8), 932 (8), 935 (8), 941 (8), 946 (7, 8)  
Pelletier, V. 277 (3)  
Pennell, F.W. 3481 (1), (1)  
Pereira, L.A. & M.A.C. Santos 184 (1)  
Pereira-Silva, G. et al. 2071 (7), 4644 (7)  
Pessoa, E.M. & A. Melo 1003 (9)  
Pessoa, E.M. et al. 336 (7)  
Philcox, D. & A. Ferreira 3944 (8), 3957 (6)  
Philcox, D. & E. Ramcharan 8157 (1)  
Philcox, D. et al. 3503 (8)  
Pignal, M. & N. Charrier-Arrighi 1968 (3)  
Pinkus, A.S. 156 (5)  
Pipoly, J.J. et al. 11174 (5), 11390 (1)  
Pipoly, J.J. & K. Alfred 7890 (1)  
Pirani, J.R. et al. 5213 (8)  
Pires, J.M. & G.A. Black 6084 (8)  
Pires, J.M. & N.T. Silva 6756 (8), 6757 (7)  
Pittier, H.F. 7405 (1)  
Plowman, T. & W.W. Thomas 13595 (5)  
Poepfig, E.F. 1601B (1)  
Poncy, O. 2853 (3)  
Powell, C.W. 113 (3400) (1), 3395 (1)  
Prévost, M.F. 1280 (3), 1847 (3), 4169 (3)  
Purdie, W. s.n. (1)  
Radosavljevic, A. et al. 230 (5), 261 (5)  
Raugh-Hink B16 (2)  
Ravet s.n. (HJBG-0132) (3)

Redden, K.M. et al. 7104 (9), 7195 (1)  
Renz, O. 3847 (1), 4275 (1), 4374 (1), 5720 (1), 7108 (1), 7226 (1), 9149 (1), 9374 (1), 9571 (1), 9823 (1), 14011 (3)  
Restrepo, J.F. 496 (1)  
Ribeiro, B.G.S. 966 (1)  
Robles, C. et al. 2314 (1)  
Rodrigues, K.F. & R. Belinello 66 (6)  
Rodrigues, R.S. 1438 (8)  
Romero, G.A. et al. 2410 (9)  
Romero, R. et al. 7473 (7)  
Romero-Castaneda, R. 1501 (1)  
Rosa, P.O. et al. 2099 (8)  
Rubio, D. & C. Quelal 711 (4)  
Salles, A.E.H. & F.P.R. de Jesus 3003 (8)  
Salles, A.E.H. 3560A (7)  
Sambin, A. 1254 (3), 1255 (3), 1256 (3), 1257 (3)  
Sambin, A. & D. Essers 1052 (3), 1107 (3)  
Sambin, A. & G. Chiron 1032 (3)  
Sambin, A. & M. Aucourd 1224 (3)  
Sanín, D. 6454 (1)  
Sankaralli, A.R. s.n. (TRIN 13393) (1)  
Santa, J. 1248 (1)  
Sarmiento, F. 860 (1)  
Sarhou, C. 231 (3), 913 (3)  
Sastre, C. 4464 (3), 4723 (3), 5810 (3)  
Schnee, L. 1118 (1)  
Schneider, M. 183 (1)  
Schomburgk, R.H. s.n. (K000079712, P00367101) (1)  
Schultes, R.E. & I. Cabrera 19001 (1), 19485 (1)  
Schultes, R.E. 5442a (1)  
Schwarz, E. & P. Anduze 3 (1)  
Seibert, R.J. 594 (1)  
Seifriz, W. 606 (1)  
Silva, J.A. et al. 431 (1)

Silva, J.B.F. da 584 (1), 1146 (5)  
Silva, J.M. et al. 9947 (7)  
Silva, M.R. s.n. (HUFU 32210) (7)  
Simões, A.O. et al. 1201 (8)  
Smith, J.F. et al. 4157 (3)  
Sneidern, K. von 104 (1)  
Souza, V.C. et al. 30143 (7)  
Spruce 3603 (1)  
Stergios, B.G. 11192 (1)  
Steyermark, J.A. 57131 (1), 60126 (5), 74849 (5), 75750 (5), 106114 (1)  
Steyermark, J.A. et al. 10407 (1)  
Sullivan, G.A. 446 (1)  
Sytsma, K.J. & L. Andersson 4788 (1)  
Taylor, M.A.H. 71 (1)  
Thomas, W.W. et al. 12975 (8)  
Tillett, S.S. et al. 44944 (5)  
Tostain, O. 3110 (3)  
Trujillo-Q, P.V. et al. 5850 (1)  
Ulitzka, M. 65 (3)  
Vale, A.A. et al. 183 (6)  
van der Werff, H. & Á.C. González 4897 (1)  
van Rooden, J. et al. 626 (2)  
Vasconcelos, M.F. de s.n. (BHCB 40157) (6)  
Veyret, Y. 1368 (3), 1585 (3), 1618 (3), 1626 (3)  
Viana, P.L. et al. 1397 (8)  
Villiers, J.F. & C. Sarthou 6041 (3), 6110 (3), 6289 (3), 6401 (3)  
Villiers, J.F. 4046 (3)  
Walter, B.M.T. et al. 711 (7), 884 (7)  
Webster, G.L. et al. 9647 (1)  
White, O.E. 2308 (6)  
Williams, R.O. & W.G. Freeman s.n. (TRIN 11319) (1)  
Woytkowski, F. 6228 (8)  
Wurdack, J.J. & L.S. Adderley 42983 (1), 43272 (9), 43763 (9)  
Wurdack, K.J. & C. Perry 5160 (1)

Wurdack, K.J. et al. 4897 (9), 5713 (1), 5897 (1)

Zanatta, M.R.V. 1146 (7)
