# Supplementary material
Source: publisher figshare collection journal article supplement (https://tandf.figshare.com/articles/dataset/_/23182704)
Supplement: Supplementary file 3 [file 1 › tsab_a_2207575_sm5793.pdf]

**Appendix 1.** Species of *Cleistes* and outgroup taxa included in the molecular study, voucher data, markers and GenBank accession numbers.

| Species                                                                         | Voucher                             | Data collected                                                           | GenBank accessions                                                   |
|---------------------------------------------------------------------------------|-------------------------------------|--------------------------------------------------------------------------|----------------------------------------------------------------------|
| <i>Cleistes aphylla</i> (Barb. Rodr.) Hoehne                                    | Pansarin and Mickeliunas 899 (UEC)  | ITS, <i>trnL-F</i>                                                       | EU498138, EU498194                                                   |
| <i>Cleistes aphylla</i> (Barb. Rodr.) Hoehne                                    | Mickeliunas and Pansarin 14 (UEC)   | <i>rps16</i> , <i>rbcL</i> , <i>psaB</i> , 18S, 26S                      | EU498167, EU498117, EU498094, JX912738, JX912806                     |
| <i>Cleistes bella</i> Rchb. f & Warm.                                           | Pansarin and Mickeliunas 921 (UEC)  | <i>trnL-F</i>                                                            | EU498195                                                             |
| <i>Cleistes bella</i> Rchb. f & Warm.                                           | Mickeliunas and Pansarin s.n. (UEC) | ITS, <i>rps16</i> , <i>rbcL</i> , <i>psaB</i> , 18S, 26S                 | EU498140, EU498168, EU498118, EU498095, JX912740, JX912810           |
| <i>Cleistes castaneoides</i> Hoehne                                             | Pansarin and Mickeliunas 873 (UEC)  | <i>rps16</i>                                                             | EU498170                                                             |
| <i>Cleistes castaneoides</i> Hoehne                                             | Pansarin et al. s.n. (UEC)          | <i>trnL-F</i>                                                            | EU498196                                                             |
| <i>Cleistes castaneoides</i> var. <i>augusta</i> (Hoehne) J.A.N.Bat. & Pansarin | Pansarin and Mickeliunas 932 (UEC)  | <i>trnL-F</i> , <i>rbcL</i> , <i>psaB</i> , 18S, 26S                     | EU498197, EU498121, EU498096, JX912753, JX912803                     |
| <i>Cleistes castaneoides</i> var. <i>augusta</i> (Hoehne) J.A.N.Bat. & Pansarin | Pansarin and Mickeliunas 935 (UEC)  | <i>trnL-F</i>                                                            |                                                                      |
| <i>Cleistes cipoana</i> Hoehne                                                  | Pansarin and Mickeliunas 915 (UEC)  | ITS, <i>rps16</i> , <i>trnL-F</i> , <i>rbcL</i> , <i>psaB</i> , 18S, 26S | EU498142, EU498171, EU498198, EU498133, EU498097, JX912756, FJ425771 |
| <i>Cleistes exilis</i> Hoehne                                                   | Pansarin and Mickeliunas 923 (UEC)  | <i>trnL-F</i> , <i>psaB</i>                                              | EU498200, EU498099                                                   |
| <i>Cleistes exilis</i> Hoehne                                                   | Mickeliunas and Pansarin 40 (UEC)   | ITS, <i>rps16</i> , <i>rbcL</i> , 18S, 26S                               | EU498145, EU498173, EU498122, JX912758, JX912804                     |
| <i>Cleistes itatiaiae</i> Pabst                                                 | Pansarin and Mickeliunas 1007 (UEC) | <i>trnL-F</i>                                                            | EU498204                                                             |
| <i>Cleistes itatiaiae</i> Pabst                                                 | Pansarin and Mickeliunas 1129 (UEC) | ITS, <i>rps16</i> , <i>rbcL</i> , <i>psaB</i> , 18S, 26S                 | EU498149, EU498177, EU498125, EU498104, JX912755, JX912808           |
| <i>Cleistes libonii</i> (Rchb. f.) Schltr.                                      | Pansarin and Mickeliunas 972 (UEC)  | ITS, <i>rps16</i> , <i>trnL-F</i> , <i>rbcL</i> , <i>psaB</i> , 18S, 26S | EU498150, EU498178, EU498207, EU498126, EU498114, JX912731, JX912809 |
| <i>Cleistes metallina</i> (Barb. Rodr.) Schltr.                                 | Pansarin and Mickeliunas 909 (UEC)  | ITS                                                                      | EU498151                                                             |
| <i>Cleistes metallina</i> (Barb. Rodr.) Schltr.                                 | Pansarin and Mickeliunas 1119 (UEC) | <i>rbcL</i> , <i>psaB</i> , 18S, 26S                                     | EU498127, EU498105, JX912729, JX912812                               |
| <i>Cleistes metallina</i> (Barb. Rodr.) Schltr.                                 | Pansarin and Mickeliunas 1145 (UEC) | <i>rps16</i> , <i>trnL-F</i>                                             | EU498180, EU498209                                                   |
| <i>Cleistes montana</i> Gardner                                                 | Mickeliunas and Pansarin 46 (UEC)   | ITS, <i>rps16</i> , <i>trnL-F</i> , <i>rbcL</i> , <i>psaB</i> , 18S, 26S | EU498146, EU498174, EU498202, EU498124, EU498102, JX912733, JX912799 |

**Table 1.** (continued)

| Species                                                    | Voucher                             | Data collected                                                           | GenBank accessions                                                   |
|------------------------------------------------------------|-------------------------------------|--------------------------------------------------------------------------|----------------------------------------------------------------------|
| <i>Cleistes paranaensis</i> (Barb. Rodr.) Schltr.          | Pansarin and Mickeliunas 920 (UEC)  | <i>rps16</i> , <i>trnL-F</i>                                             | EU498182, EU498210                                                   |
| <i>Cleistes paranaensis</i> (Barb. Rodr.) Schltr.          | Mickeliunas and Pansarin 31 (UEC)   | ITS, <i>rbcL</i> , <i>psaB</i> , 18S, 26S                                | EU498152, EU498128, EU498106, JX912737, JX912798                     |
| <i>Cleistes parviflora</i> Lindl.                          | Pansarin et al. 782 (UEC)           | <i>rps16</i> , <i>trnL-F</i> , <i>psaB</i> , 18S, 26S                    | EU498183, EU498212, EU498108, JX912757, JX912801                     |
| <i>Cleistes pusilla</i> Pansarin                           | Pansarin and Mickeliunas 901 (UEC)  | <i>rps16</i>                                                             | EU498184                                                             |
| <i>Cleistes pusilla</i> Pansarin                           | Pansarin and Mickeliunas 922 (UEC)  | ITS, <i>trnL-F</i>                                                       | EU498153, EU498213                                                   |
| <i>Cleistes pusilla</i> Pansarin                           | Mickeliunas and Pansarin 12 (UEC)   | <i>rbcL</i> , <i>psaB</i> , 18S, 26S                                     | EU498129, EU498107, JX912732, JX912817                               |
| <i>Cleistes ramboi</i> Pabst                               | Pansarin and Mickeliunas s.n. (UEC) | ITS, <i>trnL-F</i> , <i>rbcL</i>                                         | EU498154, EU498214, EU498130                                         |
| <i>Cleistes ramboi</i> Pabst                               | Pansarin et al. s.n. (UEC)          | <i>rps16</i> , <i>psaB</i> , 18S, 26S                                    | EU498185, EU498109, JX912730, JX912800                               |
| <i>Cleistes rosea</i> Lindl.                               | Cameron 1038 (NCU, WIS)             | <i>trnL-F</i> , <i>rbcL</i> , <i>psaB</i> , 18S, 26S                     | AJ409385, AF074128, AY380958, FJ425739, FJ425769                     |
| <i>Cleistes tenuis</i> Rchb. f.                            | Pansarin and Mickeliunas 940 (UEC)  | ITS, <i>rps16</i> , <i>trnL-F</i> , <i>rbcL</i> , <i>psaB</i> , 18S, 26S | EU498156, EU498186, EU498216, EU498131, EU498103, JX912734, JX912815 |
| <i>Cleistes uliginosa</i> Pabst                            | Pansarin and Mickeliunas 872 (UEC)  | <i>trnL-F</i>                                                            | EU498218                                                             |
| <i>Cleistes uliginosa</i> Pabst                            | Pansarin and Mickeliunas 984 (UEC)  | ITS, <i>rps16</i> , <i>rbcL</i> , <i>psaB</i> , 18S, 26S                 | EU498158, EU498189, EU498132, EU498110, JX912754, JX912805           |
| <i>Cleistesopsis bifaria</i> (Fernald) Pansarin & F.Barros | Rothacker 60 (UEC)                  | ITS, <i>rps16</i> , <i>trnL-F</i> , <i>rbcL</i> , <i>psaB</i> , 18S, 26S | EU498141, EU498169, EU498224, EU498119, EU498098, JX912735, JX912793 |
