# Supplementary material
Source: publisher figshare collection journal article supplement (https://tandf.figshare.com/articles/dataset/_/23182704)
Supplement: Supplementary file 3 [file 1 › tsab_a_2207575_sm5794.pdf]

**Appendix 3.** Substitution models selected by the JModelTest software for each DNA region included in the analyses, and number of characters in the combined data matrix.

| Marker        | Substitution models        | No. characters |
|---------------|----------------------------|----------------|
| <i>trnL-F</i> | F81+G, HKY+G               | 1,500          |
| <i>rps16</i>  | F81+G, GTR+G, HKY+G        | 936            |
| ITS           | SYM+G, SYM+I               | 768            |
| 18S           | K80+G, K80+I               | 1,601          |
| 26S           | GTR+G, GTR+I               | 941            |
| <i>rbcL</i>   | HKY+G, HKY+I, K80+G, K80+I | 1,303          |
| <i>psaB</i>   | HKY+G, HKY+I               | 1,653          |
