# Supplementary material
Source: publisher figshare collection journal article supplement (https://tandf.figshare.com/articles/dataset/_/23182704)
Supplement: Supplementary file 3 [file 1 › tsab_a_2207575_sm5795.pdf]

**Appendix 2.** Figures S1-S7. Individual Maximum Likelihood (ML) analyses and Bootstrap support (BS) values of markers ITS1-5.8S-ITS2, 18S, and 26S of the nuclear DNA and markers *rps16*, *trnL-F*, *rbcL* and, *psaB* of the chloroplast DNA.

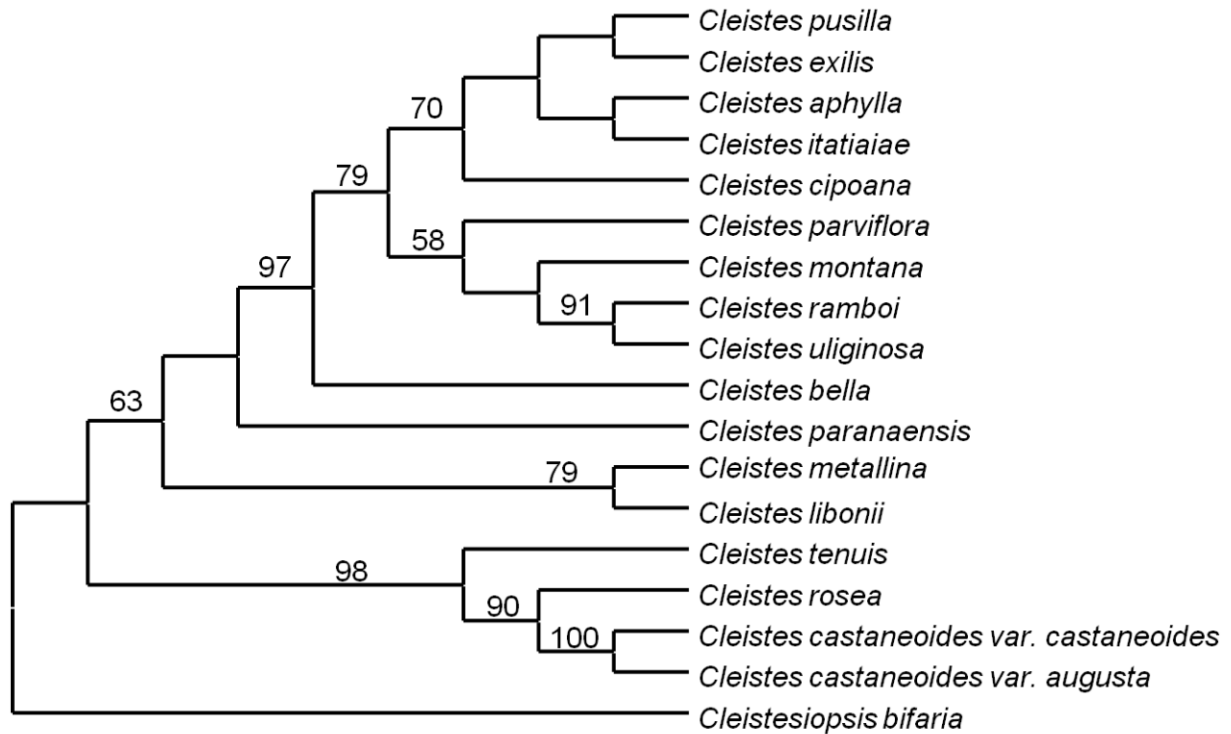

**Figure S1.** Bootstrap consensus tree based on the maximum likelihood analysis from 18S (nrDNA) sequences of *Cleistes* (Orchidaceae, Vanilloideae). Bootstrap values >50% are given above branches.

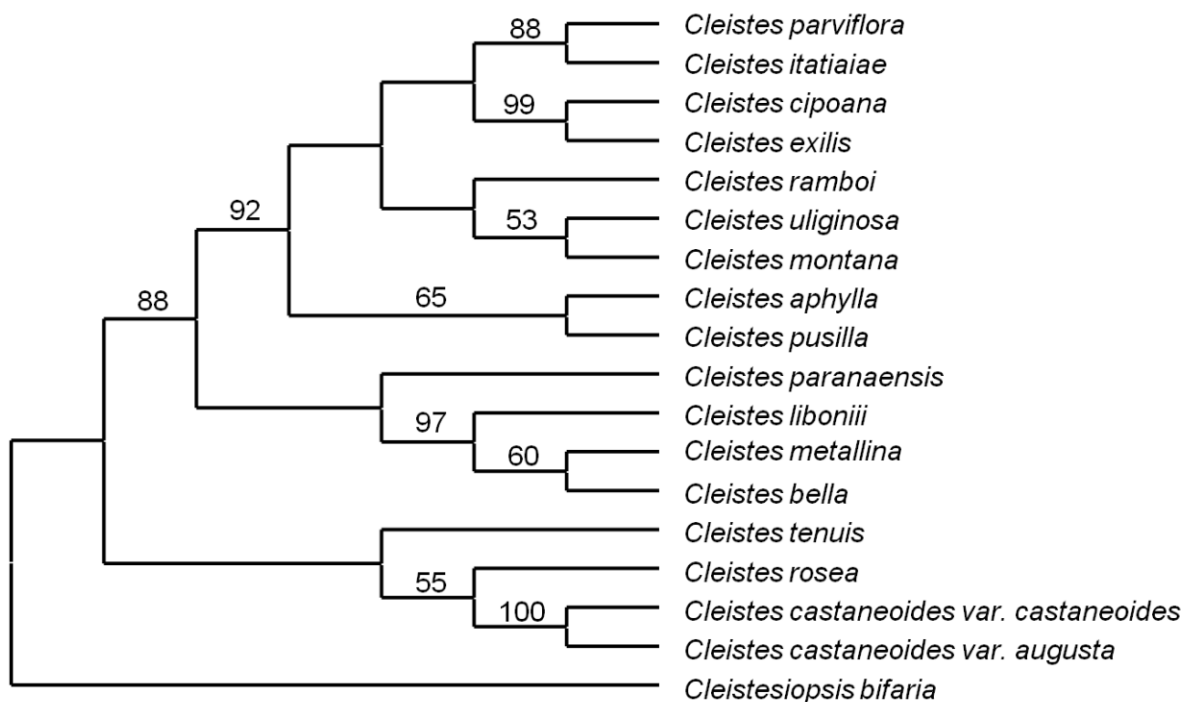

**Figure S2.** Bootstrap consensus tree based on the maximum likelihood analysis from 26S (nrDNA) sequences of *Cleistes* (Orchidaceae, Vanilloideae). Bootstrap values >50% are given above branches.

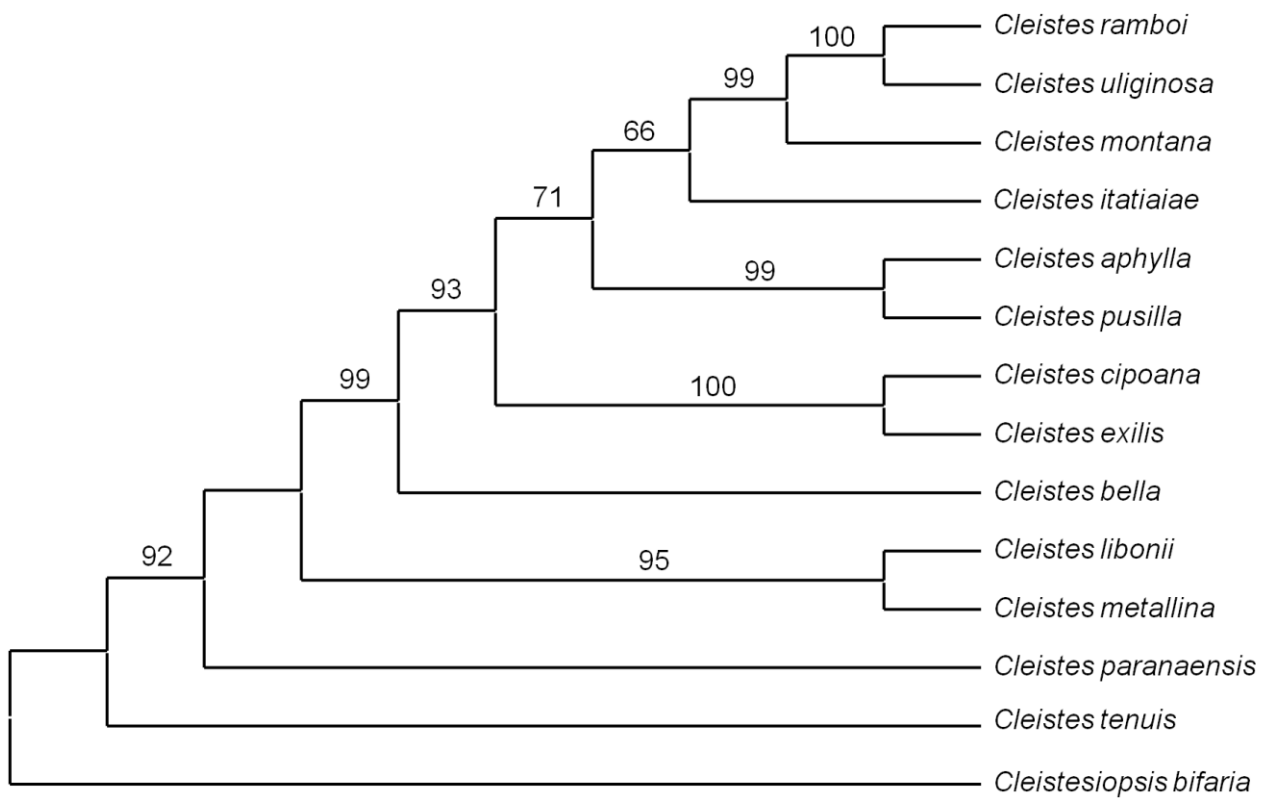

**Figure S3.** Bootstrap consensus tree based on the maximum likelihood analysis from ITS (nrDNA) sequences of *Cleistes* (Orchidaceae, Vanilloideae). Bootstrap values >50% are given above branches.

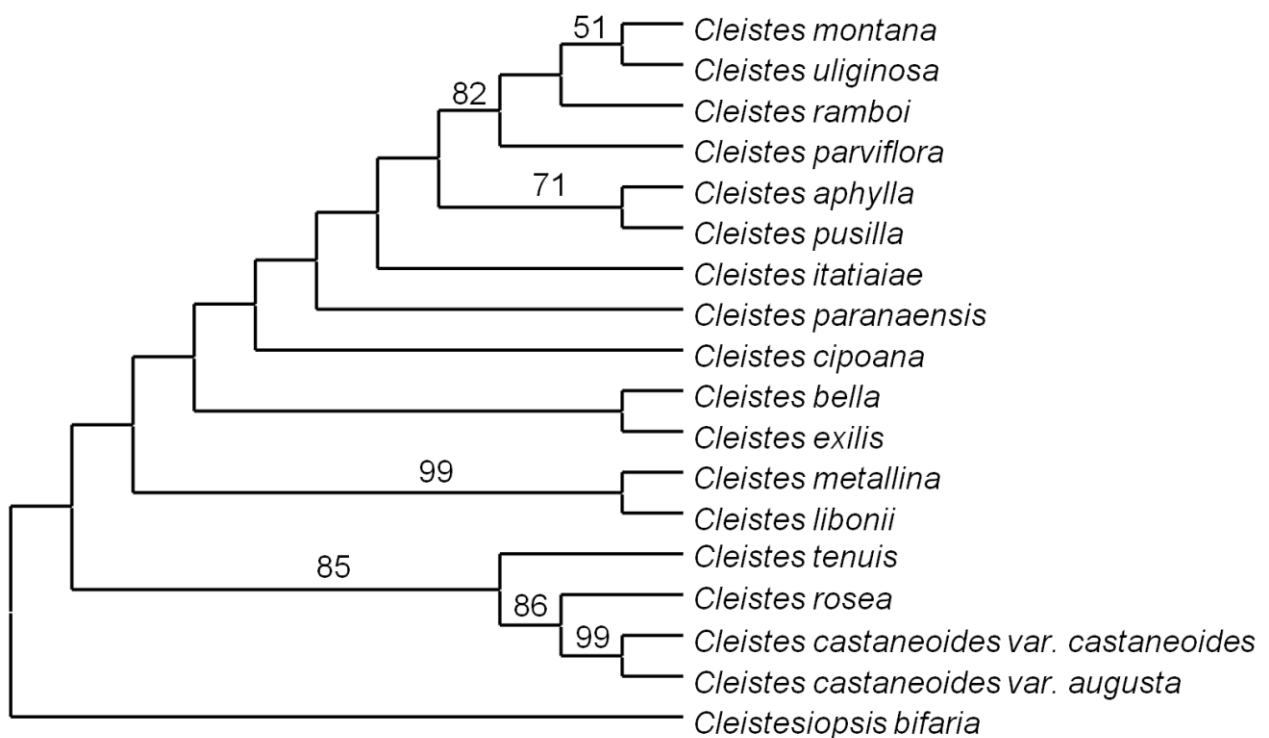

**Figure S4.** Bootstrap consensus tree based on the maximum likelihood analysis from *psaB* (cpDNA) sequences of *Cleistes* (Orchidaceae, Vanilloideae). Bootstrap values >50% are given above branches.

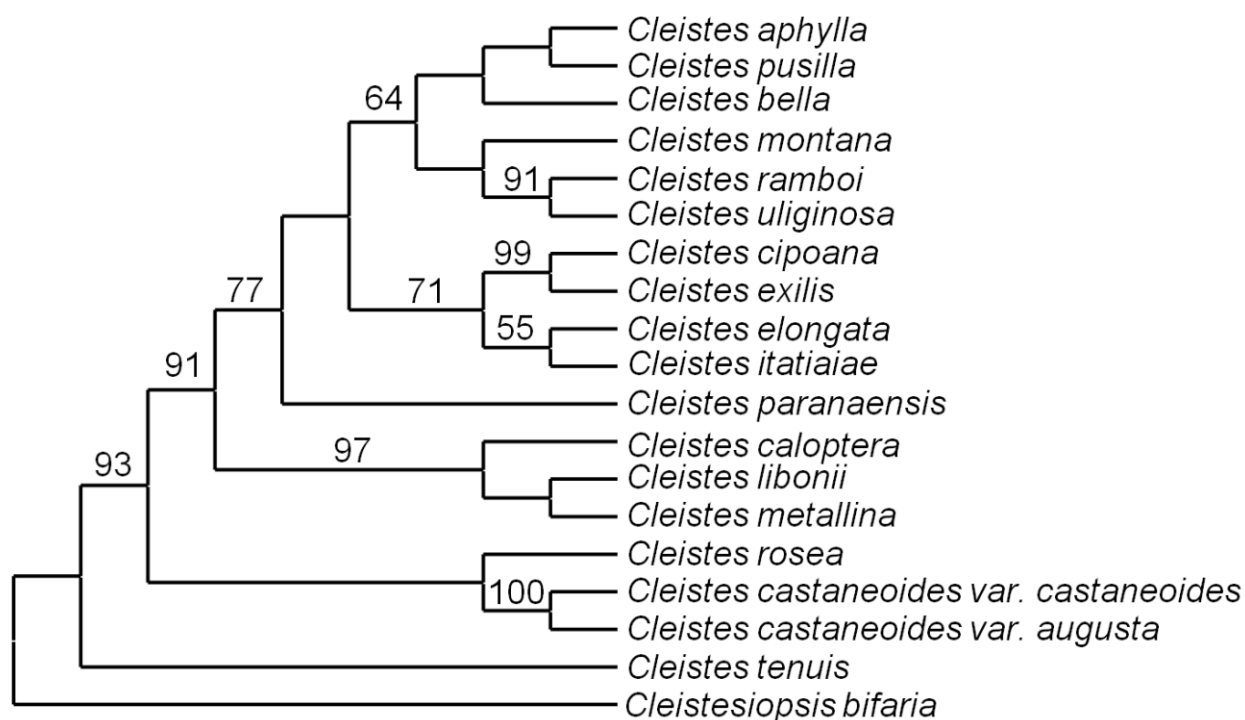

**Figure S5.** Bootstrap consensus tree based on the maximum likelihood analysis from *rbcL* (cpDNA) sequences of *Cleistes* (Orchidaceae, Vanilloideae). Bootstrap values >50% are given above branches.

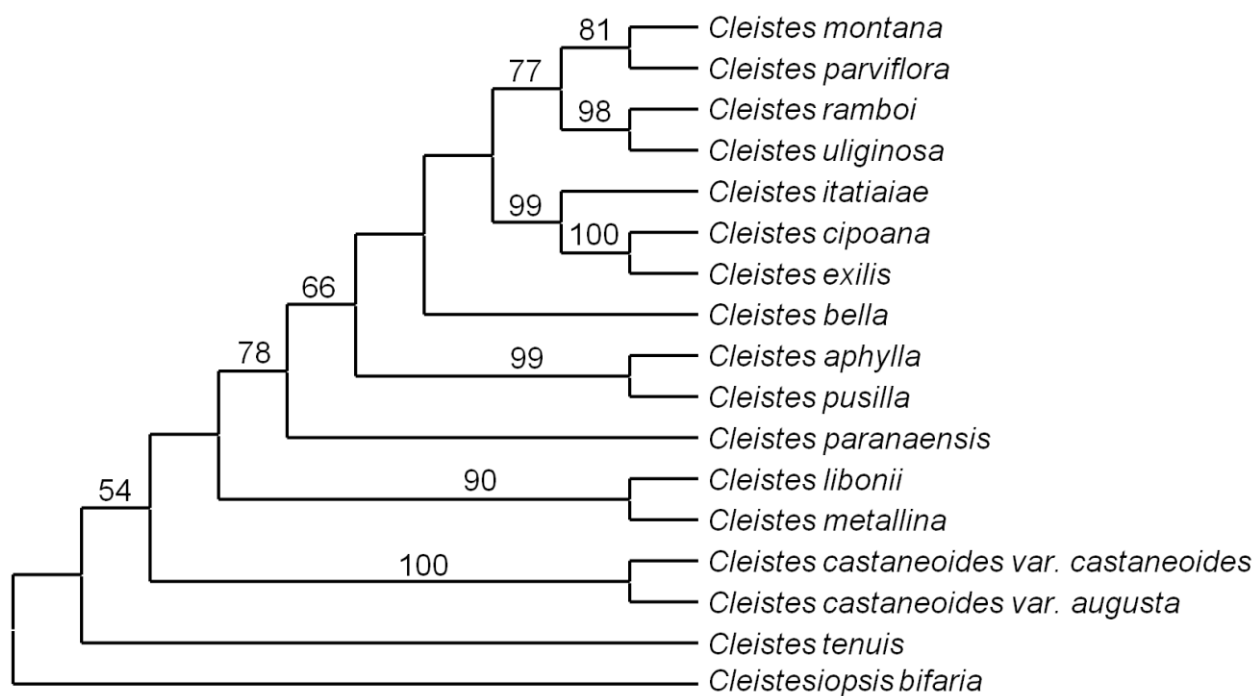

**Figure S6.** Bootstrap consensus tree based on the maximum likelihood analysis from *rps16* (cpDNA) sequences of *Cleistes* (Orchidaceae, Vanilloideae). Bootstrap values >50% are given above branches.

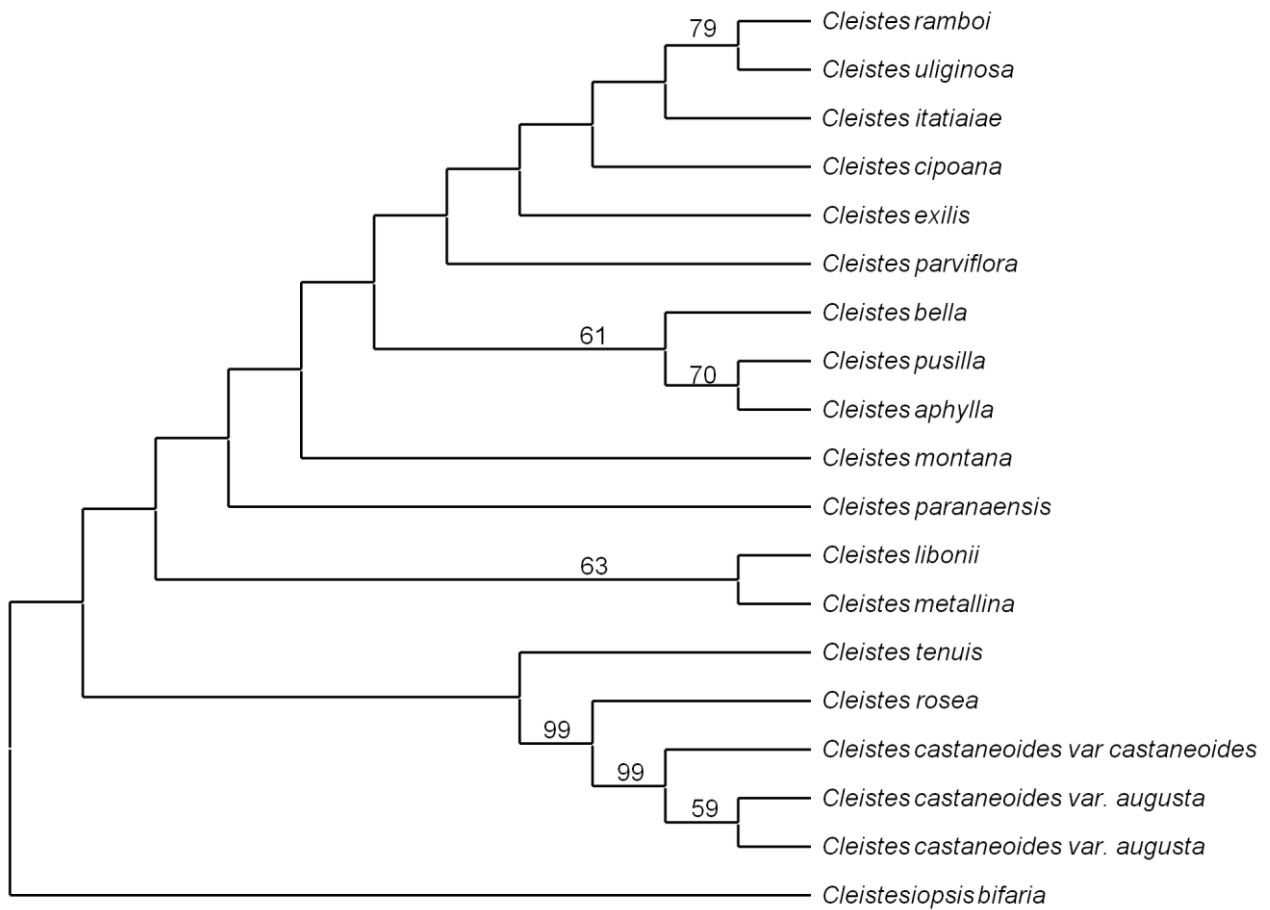

**Figure S7.** Bootstrap consensus tree based on the maximum likelihood analysis from *trnL-F* (cpDNA) sequences of *Cleistes* (Orchidaceae, Vanilloideae). Bootstrap values >50% are given above branches.
